# Supplementary material for: Efficient de novo assembly of highly heterozygous genomes from whole-genome shotgun short reads
Source: HighWire-hosted journal article supplement (doi:10.1101/gr.170720.113), 2014-04-22
Supplement: Supplemental_Material.pdf [file Supplemental_Material.pdf]

# Efficient de novo assembly of highly heterozygous genomes from whole-genome shotgun short reads

## Supplemental Materials

|                                                                           |    |
|---------------------------------------------------------------------------|----|
| 1. Supplemental Methods .....                                             | 3  |
| 1.1 Algorithm Detail .....                                                | 3  |
| 1.1.1 $k$ -mer coverage distribution (Contig-assembly) .....              | 4  |
| 1.1.2 De Bruijn graph construction (Contig-assembly) .....                | 4  |
| 1.1.3 Tip removal in de Bruijn graph (Contig-assembly) .....              | 5  |
| 1.1.4 Reconstruction of de Bruijn graph (Contig-assembly) .....           | 6  |
| 1.1.5 Calculation of $c_i$ and $k_{\max}$ (Contig-assembly) .....         | 9  |
| 1.1.6 Bubble removal in Contig-assembly .....                             | 11 |
| 1.1.7 Check of contigs using exact-match reads (Contig-assembly) .....    | 12 |
| 1.1.8 Mapping of reads in scaffolding .....                               | 13 |
| 1.1.9 Mapping of contig-bubbles (Scaffolding) .....                       | 14 |
| 1.1.10 Estimation of insert sizes (Scaffolding) .....                     | 15 |
| 1.1.11 Scaffold graph (Scaffolding) .....                                 | 15 |
| 1.1.12 Conflict of nodes (Scaffolding) .....                              | 17 |
| 1.1.13 Construction of scaffolds (Scaffolding) .....                      | 18 |
| 1.1.14 Reduction of conflicts (Scaffolding) .....                         | 19 |
| 1.1.15 Edge cut in scaffold graph (Scaffolding) .....                     | 20 |
| 1.1.16 Bubble removal in scaffold graph (Scaffolding) .....               | 21 |
| 1.1.17 Branch-cut in the scaffold graph (Scaffolding) .....               | 23 |
| 1.1.18 Filling gaps in scaffolding (Scaffolding) .....                    | 24 |
| 1.1.19 Masking contig ends (Scaffolding) .....                            | 24 |
| 1.1.20 Check of scaffolds using long-insert libraries (Scaffolding) ..... | 25 |
| 1.1.21 Collection of reads in gap-close (Gap-close) .....                 | 26 |
| 1.1.22 Gap-closing with assembled contigs (Gap-close) .....               | 27 |
| 1.2 Pre-process of reads .....                                            | 28 |
| 1.3 Filtering of mate-pair libraries .....                                | 28 |
| 1.4 Pre-process of reads specific for snake of Assemblathon2 .....        | 28 |
| 1.5 Pre-process of reads specific for fish of Assemblathon2 .....         | 29 |
| 1.6 Parameter optimization for assemblers .....                           | 29 |

|                                                                                                                                 |    |
|---------------------------------------------------------------------------------------------------------------------------------|----|
| 1.7 De novo assembly of oyster RNA-seq data .....                                                                               | 30 |
| 2. Supplemental Information.....                                                                                                | 31 |
| 2.1 Details of sequencing data sets.....                                                                                        | 31 |
| 2.2 17-mer frequency analysis .....                                                                                             | 33 |
| 2.3 Details of statistics of <i>C. elegans</i> assemblies.....                                                                  | 34 |
| 2.4 Total size of assembled scaffolds.....                                                                                      | 39 |
| 2.5 Example of “bubble removal” in scaffolding ( <i>S. venezuerensis</i> ).....                                                 | 41 |
| 2.6 Example of “branch cut” in scaffolding ( <i>S. venezuerensis</i> ) .....                                                    | 43 |
| 2.7 Distribution of heterozygosity across the entire <i>S. venezuerensis</i> genome.....                                        | 44 |
| 2.8 Example of alignments between BAC and scaffolds in oyster genome<br>assembling.....                                         | 45 |
| 2.9 Comparison of scaffold-NG50 length between each assembler and<br>Platanus .....                                             | 46 |
| 2.10 Comparison between Platanus scaffolds and fosmid-based reference in<br>oyster genome assembling using RNA-seq mapping..... | 47 |
| 2.11 Assembly of the Assemblathon2 data .....                                                                                   | 48 |
| 2.12 Scaffold NG10-90 length (bp).....                                                                                          | 51 |
| 2.13 NG10-NG90 number of Platanus’ scaffold.....                                                                                | 57 |
| 2.14 Contig NG10-90 length (bp) .....                                                                                           | 58 |
| 2.15 Statistics of assemblies of purely simulated data ( <i>C. elegans</i> ) .....                                              | 64 |
| 2.16 Turning-off tests for Platanus’ features.....                                                                              | 66 |
| 2.17 Downsampling benchmark test ( <i>C. elegans</i> ).....                                                                     | 68 |
| 3. References .....                                                                                                             | 75 |

## Supplemental Methods

### Algorithm Detail

#### *k*-mer coverage distribution (Contig-assembly)

Initially, *k*-mers (default, initial  $k = 32$ ) in reads are counted, excluding  $k_0$ -mers that contain non-ATGC characters. Counting is performed using a hash table and temporary files. Here, a  $k_0$ -mer and its reverse complement are not distinguished. The size of the hash table is fixed and limited memory space is required until the frequency distribution of *k*-mer coverage (the number of occurrences) is completed. For the *k*-mer frequency distribution, the coverage that corresponds to the leftmost local minimum frequency is detected using a size:7 smoothing window (Supplemental Figure 1). This coverage value is used as the threshold  $c_0$ .

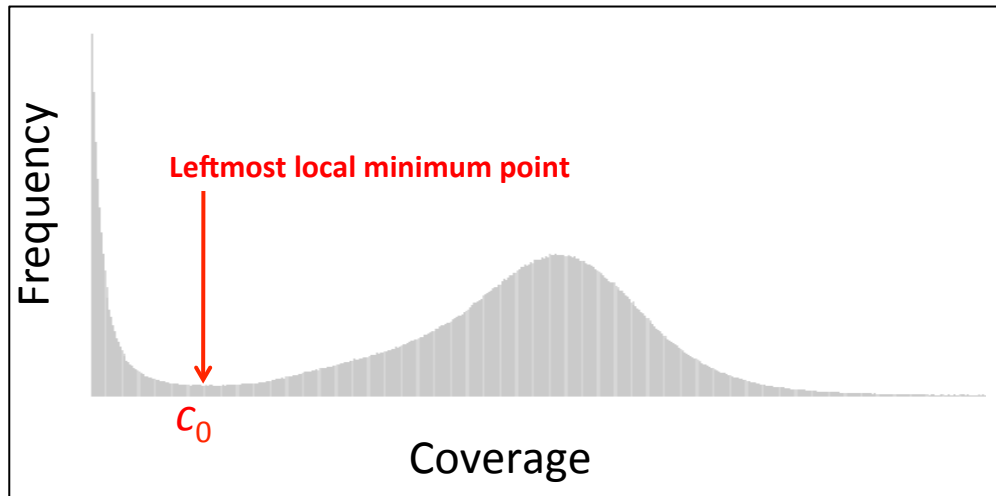

Supplemental Figure 1. *k*-mer frequency distribution and  $c_0$

### ***De Bruijn graph construction (Contig-assembly)***

In initial de Bruijn graph construction,  $k$ -mers whose coverage value is  $c_0$  or more correspond to nodes. Two  $k$ -mers that have  $(k - 1)$  overlap are connected by an edge. Note that each node represents one of the strands of the  $k$ -mer, and edges have directionality. The nodes whose outdegrees or indegrees are greater than 1 are marked as "junction nodes," while the remaining nodes are marked as "straight nodes." In order to compress the graph, adjacent straight nodes are combined (Supplemental Figure 2) and straight nodes possess multiple  $k$ -mers as strings. In fact, construction and compression of the graph are performed simultaneously. In this case, nodes hold values of length and coverage. Lengths of nodes are the length of strings composed of the contained  $k$ -mers (i.e., number of  $k$ -mers +  $k - 1$ ). Coverage of nodes denotes an average coverage of the  $k$ -mers included. In the following section, we express sets of straight nodes, junction nodes, and edges as  $S$ ,  $J$ , and  $E$ , respectively. For a node  $v$ ,  $\text{in}(v)$ ,  $\text{out}(v)$ ,  $\text{cov}(v)$ , and  $|v|$  represent the indegree, outdegree, coverage, and length of  $v$ , respectively. After the initial de Bruijn graph is constructed, average coverage is calculated from nodes ( $k$ -mers) that are not in a bubble. A bubble is defined as a set of two straight nodes and two junction nodes, for which straight nodes are connected to the same junction in both directions. Consequently, average coverage corresponds to the  $k$ -mer coverage of homozygous regions. This value is used in subsequent steps.

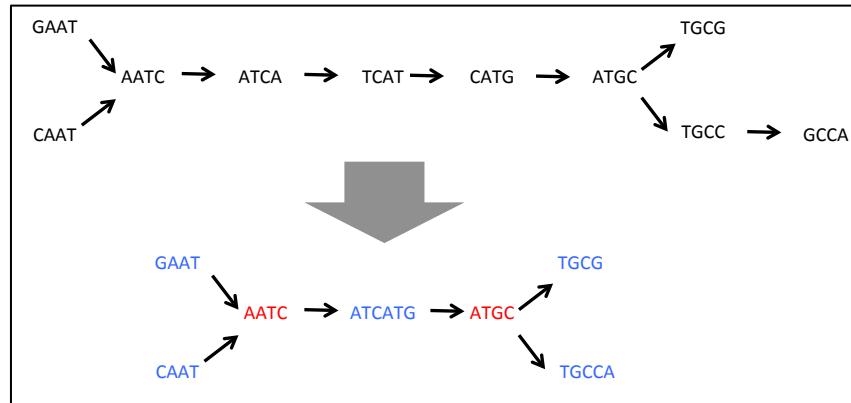

**Supplemental Figure 2. Example of de Bruijn graph ( $k = 4$ )**

Strings and arrows represent nodes and directed edges, respectively. In the upper graph,  $k$ -mers correspond to the node on a one-to-one basis. In the lower graph, red and blue strings represent the junction and straight nodes, respectively. In this case, straight nodes are compressed. Lengths of nodes are defined as the lengths of the corresponding strings.

### ***Tip removal in de Bruijn graph (Contig-assembly)***

To remove erroneous nodes, Platanus deletes dead-end nodes that are short and show relatively low coverage, referred to as "tips." The variables  $v$  and  $u$  represent straight and junction nodes, respectively, with  $v$  connected to  $u$ .  $W$  is the set of nodes that are connected to  $u$  in the same directions as  $v$ .  $C_{\text{tip}}$  is a constant value ranging from 0 to 1 (default:  $C_{\text{tip}} = 0.5$ ).  $v$  is deleted if the following three conditions are satisfied (Supplemental Figure 3):

$$\begin{aligned} |v| &< 2k \\ \text{out}(v) + \text{in}(v) &= 1 \\ \text{cov}(v) &\leq C_{\text{tip}} \cdot \max_{w \in W} \text{cov}(w) \end{aligned}$$

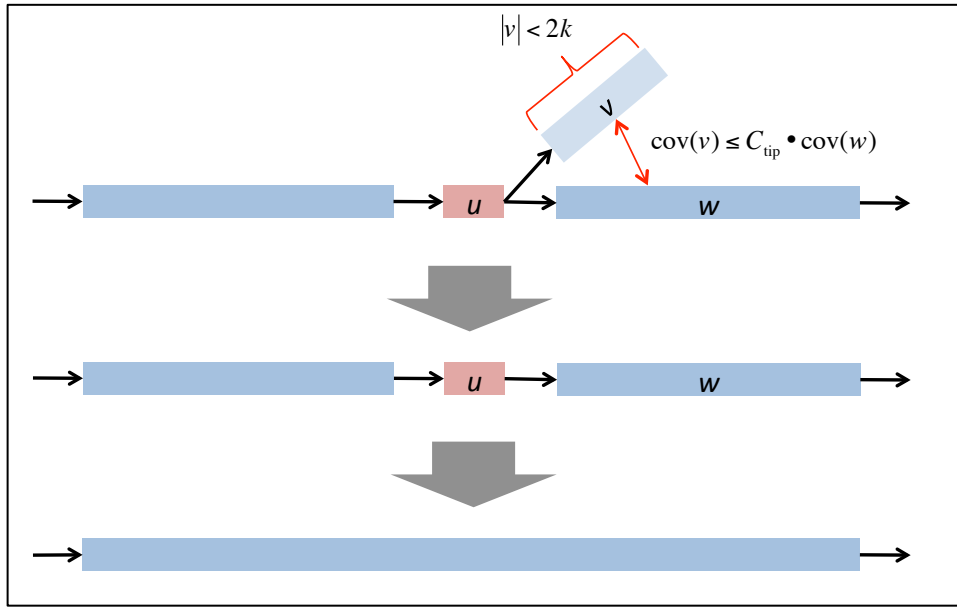

**Supplemental Figure 3. Tip removal in contig assembly**

### ***Reconstruction of de Bruijn graph (Contig-assembly)***

To resolve repeats that are shorter than reads, Platanus increases  $k$  and reconstructs the de Bruijn graph (Supplemental Figure 4). In de Bruijn graph-based assemblies, if  $k$  is large, repeats shorter than  $k$  can generally be resolved, but low-coverage sequences cannot be captured, a rationale to utilize the advantages of each  $k$ .  $k_0$  and  $k_{\text{step}}$ , the step size of  $k$ , are constant values (default,  $k_0 = 32$  and  $k_{\text{step}} = 10$ ). Maximum  $k$ ,  $k_{\text{max}}$ , is calculated according to the average  $k_0$ -mer coverage value and read length (described below).  $k_{\text{pre}}$  is previous  $k$  in certain reconstruction step. Roughly speaking, a  $k$ -mer graph consists of straight nodes of  $k_{\text{pre}}$ -mer graph and reads that are mapped near the junction nodes of  $k_{\text{pre}}$ -mer graph. The detailed procedure to reconstruct the  $k$ -mer graph from  $k_{\text{pre}}$ -mer graph consists of the following steps:

- (1) The strings of straight nodes in  $k_{\text{pre}}$ -mer graph are extended in both directions (Supplemental Figure 5). The extensions are continued until paths are forked or extra lengths are reached ( $k - k_{\text{pre}}$ ).
- (2)  $k$ -mers in extended strings are extracted. Coverage of  $k$ -mers from a straight node  $v$  is weighed as below:

$$\text{cov}(v) \cdot \frac{r - k + 1}{r - k_{\text{pre}} + 1}$$

where  $r$  denotes average read length.

- (3) For the  $k_{\text{pre}}$ -mer graph,  $k_{\text{pre}}$ -mers within distance of  $(k - k_{\text{pre}})$  from junctions are marked (Supplemental Figure 6). Marked  $k_{\text{pre}}$ -mers are defined as "junction-neighboring  $k_{\text{pre}}$ -mers."
- (4) Reads that contain junction-neighboring  $k_{\text{pre}}$ -mers are collected, and  $k$ -mers within are counted.
- (5) Two tables of  $k$ -mers made in (2) and (4) are merged.  $k$ -mers whose coverage is less than the threshold value  $c_i$  (described below) are discarded.

Using this method, connectivity information in the  $k_{\text{pre}}$ -mer graph is transferred to the  $k$ -mer graph.

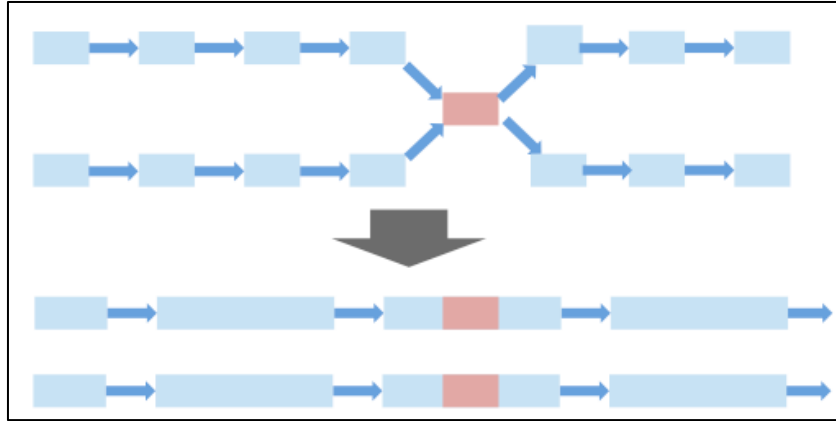

**Supplemental Figure 4.  $k$ -mer extension and solution of repeat sequence**

Blue boxes represent  $k$ -mers. Red boxes represent repetitive sequences.

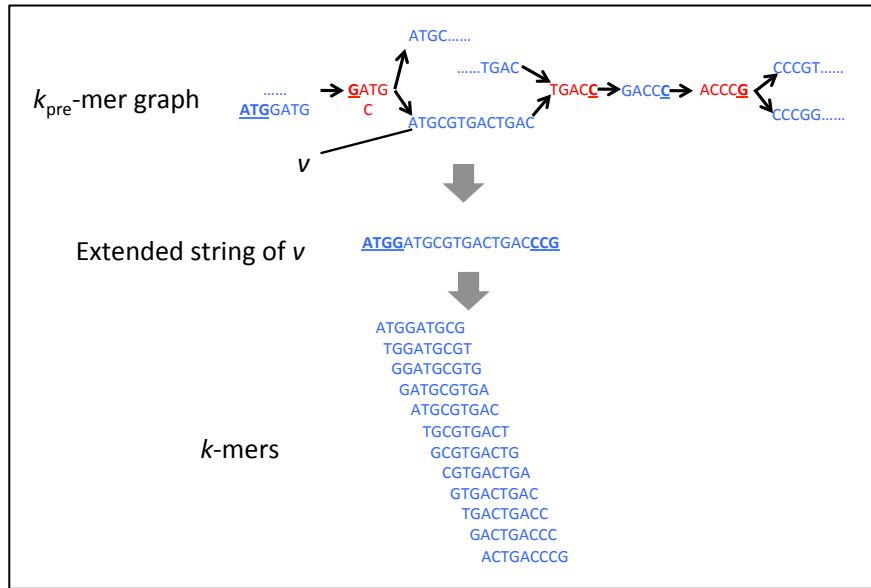

**Supplemental Figure 5. Conversion of a straight node in graph reconstruction**

Conversion of node  $v$  is displayed ( $k_{\text{pre}} = 5$ ,  $k = 9$ ) as an example. The extension of  $v$  is continued until paths are forked or the extended length reaches  $(k - k_{\text{pre}})$ . Resulting  $k$ -mers are used for the construction of  $k$ -mer graph.

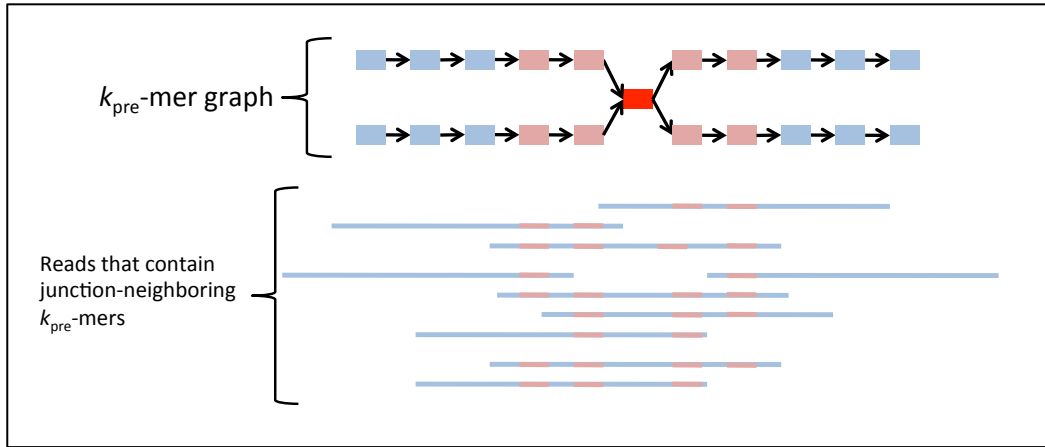

### Supplemental Figure 6. Extraction of reads in graph reconstruction

$k - k_{\text{pre}} = 2$ . Blue boxes:  $k_i$ -mers in straight nodes. Deep red box: junction node. Light red boxes:  $k_i$ -mers within distance of  $(k - k_{\text{pre}})$  from junction (junction-neighboring  $k_i$ -mers).

Reads that contain junction-neighboring  $k_{\text{pre}}$ -mers are collected, and the  $k$ -mers within are counted. Colors in the reads correspond to those of the  $k_{\text{pre}}$ -mer graph.



### Calculation of $c_i$ and $k_{\max}$ (Contig-assembly)

Misassemblies are generally caused by the presence of repetitive regions (Supplemental Figure 7). A higher minimum coverage threshold causes a greater number of misassemblies. In addition, an increase in  $k$  is associated with a decrease in average  $k$ -mer coverage due to a decline in both the total number of  $k$ -mers and common  $k$ -mers among multiple reads. To reduce the rate of misassembly, Platanus calculates the maximum  $k$  ( $k_{\max}$ ) and minimum coverage values according to the average  $k_0$ -mer coverage and average read length. For each graph reconstruction,  $k_i$ ,  $c_i$ , and  $a_i$  represent the  $k$ -mer length, minimum coverage, and estimated average coverage, respectively. The  $k_0$  variable is a constant. Determination of  $c_0$  is described above (Supplemental Methods,  $k$ -mer coverage distribution). The  $a_0$  variable denotes the average coverage of  $k_0$ -mers ( $\geq c_0$ ). The score  $s_{\text{split}}(k, k_{\text{pre}}, a, c)$ , associated with the probability of splitting correct edges, is defined as follows:

$$s_{\text{split}}(k, k_{\text{pre}}, a, c) = 1 - (1 - e^{-a} \sum_{j=0}^{c-1} \frac{a^j}{j!})^{k-k_{\text{pre}}}$$

where  $k$  denotes  $k$ -mer size,  $k_{\text{pre}}$  denotes  $k$  of previous graph,  $a$  denotes average coverage,  $c$  denotes minimum coverage, and it is assumed that  $k$ -mer coverage obeys a Poisson distribution. If the score  $s_{\text{split}}(k, k_{\text{pre}}, a, c)$  is high, probability of misassembly is high. In addition,  $a$  is determined as follows:

$$a = a_{\text{pre}} \frac{r - k + 1}{r - k_{\text{pre}} + 1}$$

where  $r$  denotes the average read length.

Two constant values,  $c_{\min}$  and  $s_{\max}$  (default:  $c_{\min} = 2$ ,  $s_{\max} = 10^{-10}$ ), are introduced herein.  $c_{\max}$  is determined as the maximum  $c$  that satisfies the following conditions:

- (1)  $c_{\min} \leq c \leq c_{\max}$
- (2)  $s_{\text{split}}(k, k_{\text{pre}}, a, c) \leq s_{\max}$

where  $k = k_{\text{pre}} + k_{\text{step}}$  until  $c$  satisfies the two existing conditions. If  $c$  is not found, an acceptable  $k$  is sought by increasing the  $k_{\text{pre}}$  value by 1, and  $k_{\max} = k$ . In short, Platanus determine  $k$ , thereby satisfying the criteria of the probability of misassembly.

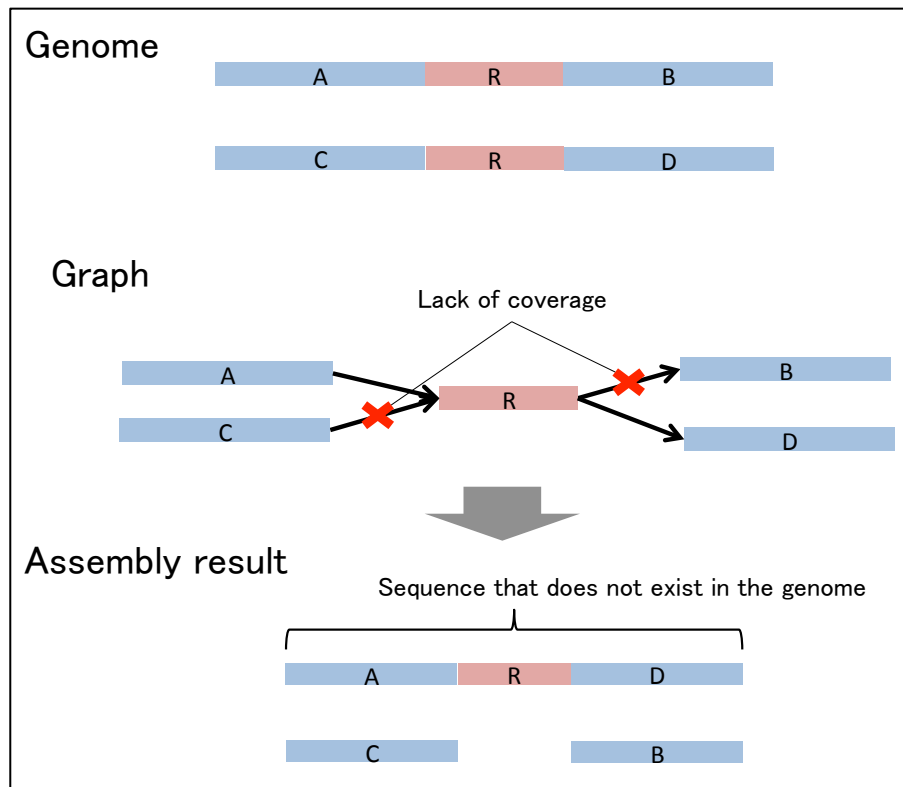

**Supplemental Figure 7. Misassembly through repetitive sequence**  
 R (red box) represents a repetitive sequence.

### ***Bubble removal in Contig-assembly***

After reconstruction and tip removal of the  $k_{\max}$ -mer graph, "bubbles" in the graph are removed. Bubble structures are caused by heterozygosity of diploid samples and errors (Supplemental Figure 8). A bubble is defined as a set of two straight nodes and two junction nodes, for which straight nodes are connected to the same junction nodes bidirectionally. In deciding whether to remove a bubble, the coverage and edit distance of two straight nodes are examined. We define  $\text{edit}(v, u)$  as the edit distance between two straight nodes,  $v$  and  $u$ , and introduce the constant value  $C_{\text{bubble}}$  (default, 0.1). A straight node that has lower coverage is deleted if a bubble including straight nodes  $v$  and  $u$  satisfies the following two conditions:

- (1)  $\text{cov}(v) + \text{cov}(u) < 1.5a$  ( $a$ : average  $k_{\max}$ -mer coverage)
- (2)  $\text{edit}(v, u) \leq C_{\text{bubble}} \cdot \max(|v|, |u|)$

Strings of removed nodes are saved for scaffolding and analysis. After bubble removal, strings of the remaining straight nodes are generated as contig outputs.

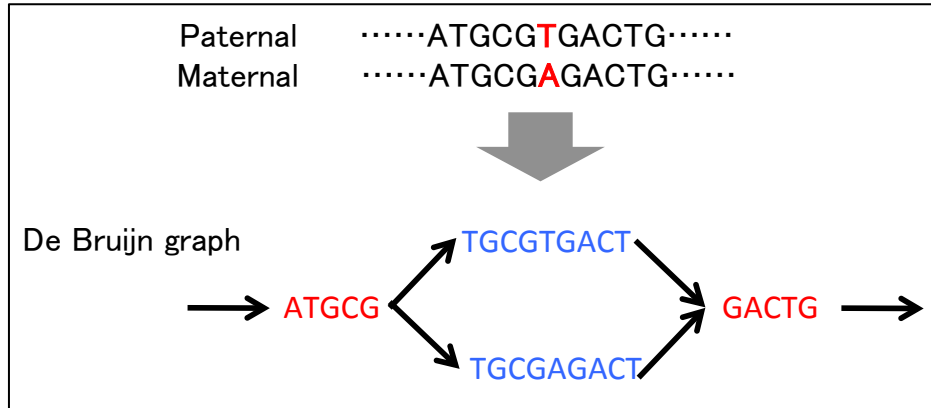

**Supplemental Figure 8. Bubble in de Bruijn graph**

$k = 5$ . A bubble structure caused by a single nucleotide polymorphism (SNP) is provided as an example.

### ***Check of contigs using exact-match reads (Contig-assembly)***

After the removal of bubbles, reads are mapped on the resulting contigs and Platanus attempts to detect misassemblies. Here, reads that exactly match contigs are used. After mapping, a contig is split if it is situated in the inside position where there exists no overlap ( $\text{length} > k_0$ ) among mapped reads (Supplemental Figure 9).

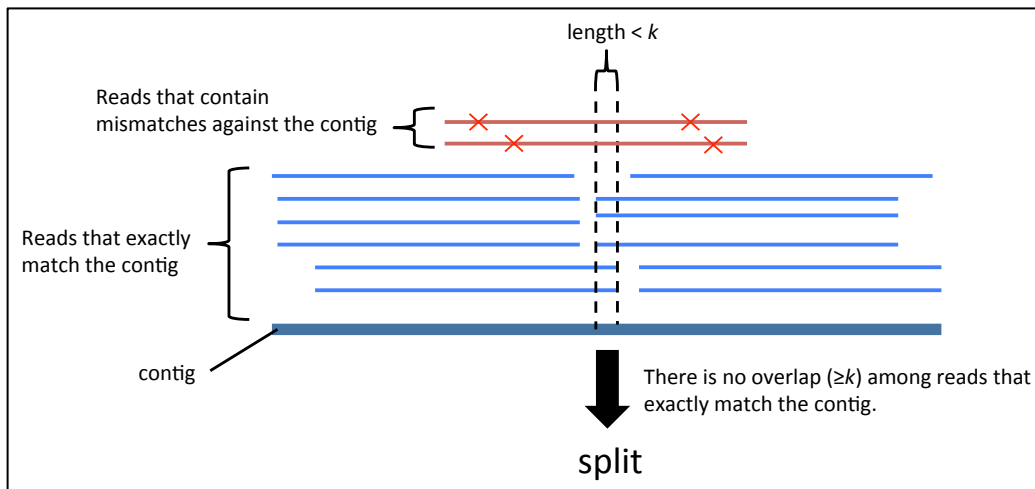

**Supplemental Figure 9. Check of contig using exact-match reads**

### ***Mapping of reads in scaffolding***

In scaffolding, Platanus initially maps all paired reads on contigs. The mapping results are used for the estimation of library insert sizes and for linking contigs. Before mapping, a hash table is made. For this table, keys and values correspond to all  $k$ -mers (default,  $k = 32$ ) in contigs and positions. A read is mapped in the following manner (Supplemental Figure 10):

- (1)  $k$ -mers in each read are collected without overlaps.
- (2) These  $k$ -mers are queried in the hash table. If a  $k$ -mer uniquely exists in contigs, it is mapped to the corresponding position.
- (3) The contig is determined according to majority rule, using map results of the  $k$ -mers.  
If the top number is a tie score, the read is treated as a non-hit.
- (4) The position is determined as an average of inferred positions of the mapped  $k$ -mers.

If one of the paired reads is not mapped, the pair is excluded in the subsequent step.

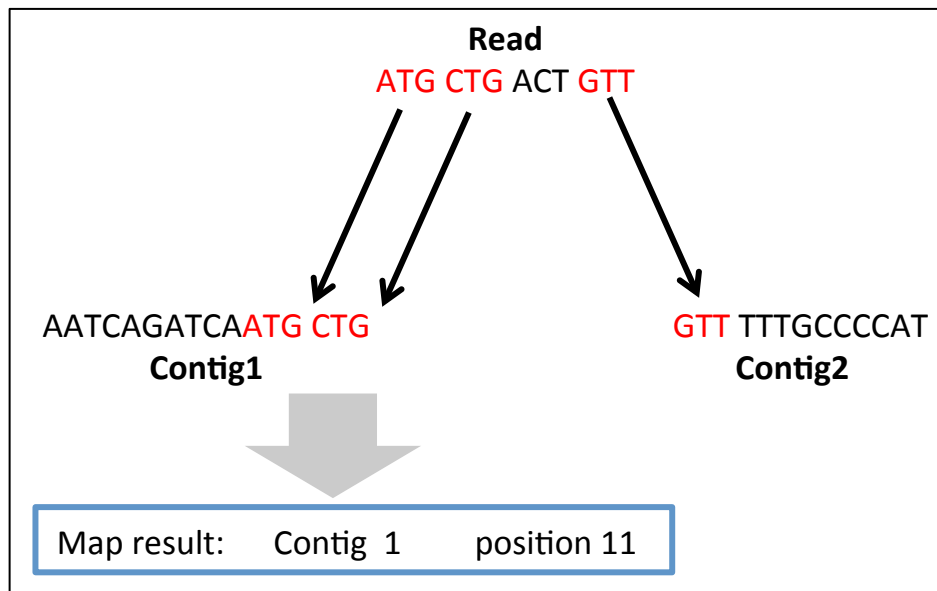

**Supplemental Figure 10. Mapping of a read**

The  $k$ -mer size for mapping is 3 in this figure. From the read, 4  $k$ -mers are taken. Two are mapped on contig1, 1 is mapped on contig2, and another remains unmapped. According to the majority rule, the read is mapped on contig1.

### ***Mapping of contig-bubbles (Scaffolding)***

For diploid samples, the resulting sequences from Contig-assembly are mosaics of homologous chromosomes. Any number of scenarios may occur within one contig, including the observation that some regions represent the paternal chromosome and others represent the maternal chromosome. To map reads from the heterozygous region, Platanus integrates contigs and sequences of bubbles that are deleted in Contig-assembly (Supplemental methods, *Bubble removal in Contig-assembly*). Sequences of bubbles are mapped on contigs using exact matches of edges. The relation of contig and bubble sequences is saved. Reads that are not mapped on contigs are re-queried to bubble sequences. In reads that are mapped on bubble sequences, mapped positions are converted into their corresponding contig positions (Supplemental Figure 11).

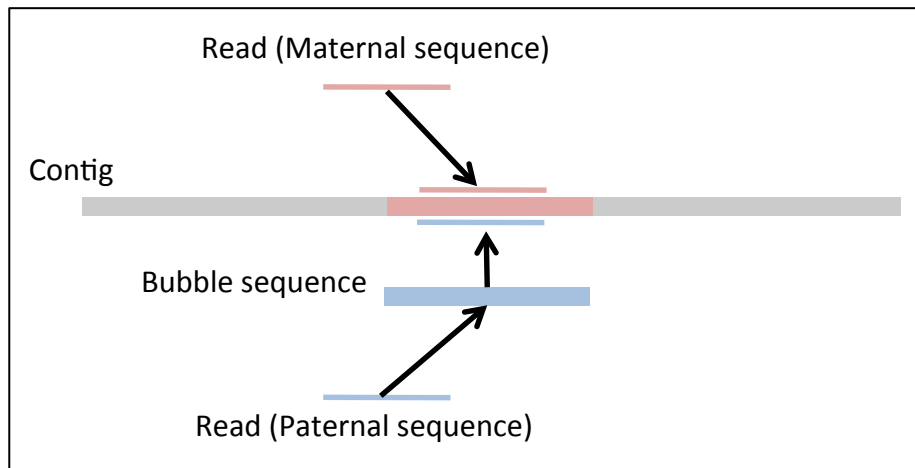

**Supplemental Figure 11. Mapping of reads from the heterozygous region**

### ***Estimation of insert sizes (Scaffolding)***

For each library, the insert size is estimated using paired reads that are mapped on the same contig (scaffold). In scaffolding, libraries are used according to the order of input. For longer-insert libraries, insert sizes are estimated using scaffolds constructed by shorter-insert libraries. If both paired reads are mapped onto the same strand or the inferred insert size is a negative value, that pair is not used.

To estimate the insert size, the peak is first detected in the distribution of insert sizes using the window with a size of 101. Means and standard deviations of the insert size are calculated excluding the outliers ( $<0.5 \times \text{peak-insert-size}$  or  $>1.5 \times \text{peak-insert-size}$ ).

### ***Scaffold graph (Scaffolding)***

When paired reads are mapped onto different contigs, we refer to the paired reads as "links." Contigs and links are converted into a graph structure. Contigs in these graphs correspond to nodes and nodes have length values. If the number of links between contigs (nodes) is above the threshold  $n$ , an edge connects the nodes. Each edge consists of two values: the number of links and the estimated distance (Supplemental Figure 12). Here, we describe the variables as follows.

$r$ : Average read length

$c$ : Average coverage (Total-length-of-mapped-reads/Total-length-of-contigs)

$\mu$ : Average insert size

$\sigma$ : Standard deviation of insert size

$l_1, l_2$ : Length of two contigs

$g$ : Actual gap size between contigs

In the estimation of distances, all paired reads that link contigs are treated as their insert sizes equal to the average insert size of the library. For each pair of contigs, the maximum likelihood approach is used for the estimation of distances, assuming that the distribution of insert sizes follows a normal distribution (mean:  $\mu$ , variance:  $\sigma^2$ ). For each pair of reads,  $s_i(d)$  ( $i = 1, 2, \dots, \text{number-of-pairs}$ ) is defined as the insert sizes resulting from the distance (gap size) between contigs,  $d$ . Estimated distance is calculated as follows:

$$\operatorname{argmax}_d \prod_i \frac{1}{\sqrt{2\pi\sigma^2}} \exp\left(-\frac{(s_i(d) - \mu)^2}{2\sigma^2}\right)$$

Minimum numbers of links,  $n$ , are specified in two ways for each library. First, the expected value of the number links between two contigs is calculated. It is assumed that insert sizes obey the normal distribution and that coverage is uniform. The expected number of links is calculated in the following manner:

$$\int_0^{l_1-r} \int_{l_1+g+r-y}^{l_1+g+l_2-y} \frac{c}{2r} \frac{1}{\sqrt{2\pi\sigma}} \exp\left(-\frac{(x-\mu)^2}{2\sigma^2}\right) dx dy$$

where  $n_{\text{exp}}$  is determined as the expected number for which  $g = \mu - 2r$  and  $l_1 = l_2 =$  average contig length. Second,  $n_{\text{min}}$  is defined as a constant value (default, 3). If  $n_{\text{min}} < n_{\text{exp}}$ , scaffolding is initially performed with  $n = n_{\text{exp}}$  and is subsequently performed with  $n = n_{\text{min}}$ . In other instances, only  $n_{\text{min}}$  is applied. Note that  $n_{\text{exp}}$  is calculated for each library.

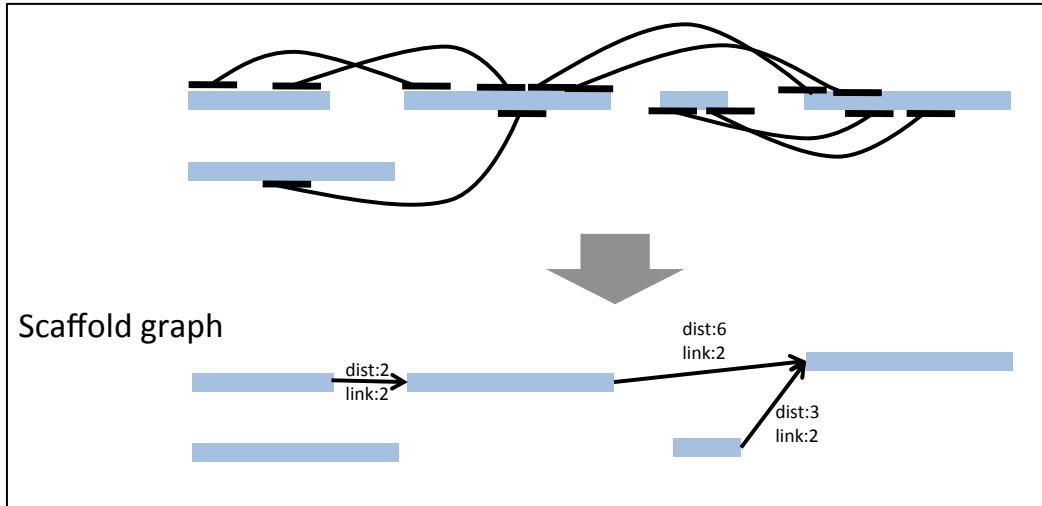

**Supplemental Figure 12. Scaffold graph**

Blue boxes are contigs (nodes) and black arrows are edges. In this case, the minimum number of links is 2. Each edge possesses 2 values: the number of links (link) and estimated distance (dist).



### ***Conflict of nodes (Scaffolding)***

As an example, consider node  $v$  connected to two nodes,  $u$  and  $w$ . Nodes  $u$  and  $w$  are positioned based on  $v$ , considering the distances between the nodes and length of nodes. If  $u$  and  $w$  overlap, and the overlap is longer than the threshold  $o$ ,  $u$  conflicts with  $w$  (Supplemental Figure 13).  $o$  denotes a tolerance of overlaps and is applied in one of two ways for each library, as for  $n$  (denoting the minimum number of links). First,  $o$  is set to  $2\sigma$  ( $\sigma$  is the standard deviation of insert size), and then  $o$  is set to  $3\sigma$ .

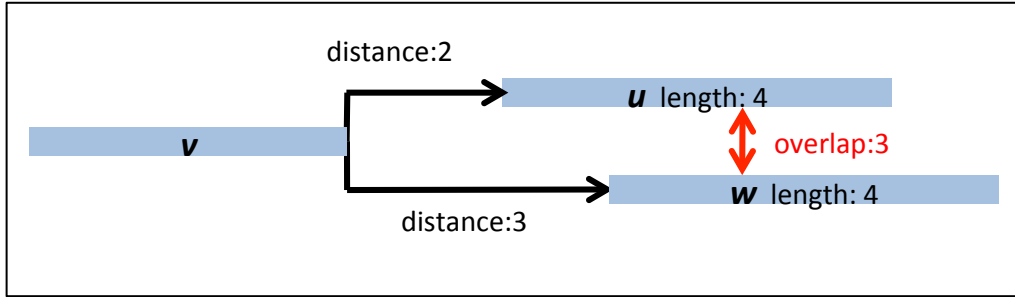

**Supplemental Figure 13. Overlap of nodes in the scaffold graph**

An example of a conflict in the scaffold graph is shown.  $u$  and  $w$  are situated based on  $v$ . The overlap length is 3.

### ***Construction of scaffolds (Scaffolding)***

The variable  $V_{\text{repeat}}$  represents the set of nodes for which adjacent nodes conflict, and the variable  $V_{\text{used}}$  represents the set of nodes that are included in scaffolds in this step. The procedure to construct scaffolds from the graph is as follows:

(1) A selection of  $v_0$  is made from a node that satisfies the following conditions:

- i.  $(v_0 \notin V_{\text{repeat}} \text{ and } v_0 \notin V_{\text{used}})$
- ii.  $V_{\text{scaffold}}$  is initialized as  $V_{\text{scaffold}} = \{v_0\}$

(2) An edge  $(u, w)$  is searched that satisfies the following conditions:

$$(u \in V_{\text{scaffold}} \text{ and } u \notin V_{\text{repeat}})$$

If  $w$  does not conflict with nodes in  $V_{\text{scaffold}}$ ,  $w$  is added to  $V_{\text{scaffold}}$  and  $V_{\text{used}}$ . If multiple candidates exist for  $w$ , candidates whose distance (the number of edges) from  $v_0$  is minimal are added to  $V_{\text{scaffold}}$  and  $V_{\text{used}}$ .

(3) Step (2) is repeated until the candidate nodes to be added to  $V_{\text{scaffold}}$  are lost.

(4)  $V_{\text{scaffold}}$  is saved as a scaffold.

(5) Steps (1)–(4) are repeated until the candidate nodes of  $v_0$  are lost.

Using this procedure, the risk to connect contigs through repetitive contigs is reduced. In practice, the graph is pre-processed before construction of scaffolds (described below).

### ***Reduction of conflicts (Scaffolding)***

In order to reduce the number of contigs caused by errors or heterozygosity, Platanus begins searching the scaffold graph for pairs of nodes (contigs) that conflict and overlap. The overlaps are represented as negative values of distances between nodes. The node  $v$  is removed from the graph if the following conditions are satisfied between two nodes,  $v$  and  $u$ :

- (1)  $v$  and  $u$  are conflicting (inferred from another node and edges; Supplemental Figure 13).
- (2) Both the length and coverage of  $v$  are smaller than those of  $u$ .
- (3) Estimated distance between  $v$  and  $u$  is smaller than  $-o$ .  
[ $o$  is the tolerance of overlaps described above in the section *Conflict of nodes (Scaffolding)*]
- (4) Coverage of  $v$  is smaller than  $1.5 \times$  average coverage.

### ***Edge cut in scaffold graph (Scaffolding)***

In this step, erroneous edges that cause conflicts are deleted. The variables  $v$ ,  $u$ , and  $w$  represent the nodes of the scaffold graph where  $u$  and  $w$  conflict. We define the number of links in edge  $(v, u)$  as  $n(v, u)$ , and the expected number of links in edge  $(v, u)$  as  $e(v, u)$ . In the calculation of expected value, gap size ( $g$ ) is substituted with estimated gap size. After introducing a constant value  $C_{\text{cut}}$  (default, 0.5), edge  $(v, u)$  is deleted if the following condition is satisfied (Supplemental Figure 14):

$$\frac{n(v, u)}{e(v, u)} < C_{\text{cut}} \cdot \frac{n(v, w)}{e(v, w)}$$

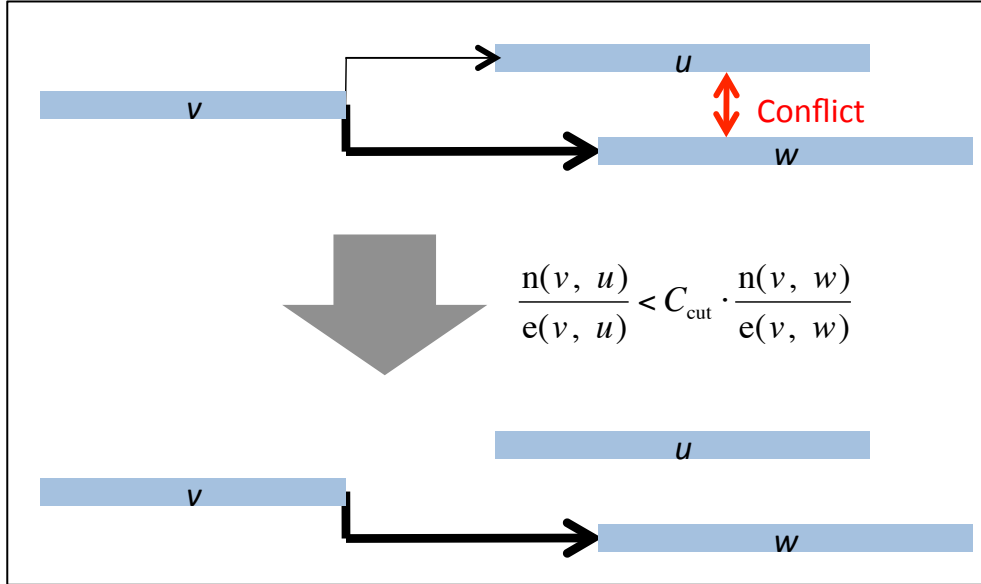

**Supplemental Figure 14. Edge cut in the scaffold graph**

An example of a conflict in the scaffold graph and the cutting edge is shown.

### ***Bubble removal in scaffold graph (Scaffolding)***

The variables  $u$  and  $w$  represent nodes that conflict with one another. In this case, scaffolds (set of nodes)  $V_u$  and  $V_w$  are locally constructed using  $u$  and  $w$  as starting points ( $v_0$ ; see Supplemental Methods, *Construction of scaffolds*). If the leftmost and rightmost segments (nodes) of  $V_u$  and  $V_w$  are common, scaffolds  $V'_u$  and  $V'_w$  are constructed excluding the common nodes,  $v_{\text{left}}$  and  $v_{\text{right}}$ .  $|V'|$ ,  $\text{cov}(V')$ ,  $\text{bub}(V')$ , and  $\text{edit}(V'_u, V'_w)$  are defined as length of strings corresponding to  $V'$ , average coverage of  $V'$ , the number of contig-bubble mapped on  $V'$  (Supplemental Methods, *Mapping of contig-bubbles*) and edit distance between  $V'_u$  and  $V'_w$ , respectively. For strings corresponding to scaffolds, gaps are represented as 'N' characters. Coverage is estimated using the  $k$ -mer coverage of each node. Here,  $a$  denotes the average coverage. The variables  $C_{\text{sim}}$ ,  $C_{\text{homo}}$ , and  $C_{\text{hetero}}$  are constant values (default, 0.1, 1.5, and 0.75, respectively). Nodes that constitute lower-coverage scaffold ( $V'_u$  or  $V'_w$ ) are deleted if one of the following two conditions is satisfied (Supplemental Figure 15):

(1)

$$\begin{aligned} &\text{cov}(V'_u) + \text{cov}(V'_w) \leq 2a \quad \text{and} \\ &\text{edit}(V'_u, V'_w) \leq C_{\text{sim}} \cdot \max(|V'_u|, |V'_w|) \quad \text{and} \\ &(\text{bub}(V'_u) = 0 \text{ or } \text{bub}(V'_w) = 0) \end{aligned}$$

(2)

$$\begin{aligned} &\text{cov}(V'_u) \leq C_{\text{hetero}} \cdot a \quad \text{and} \\ &\text{cov}(V'_w) \leq C_{\text{hetero}} \cdot a \quad \text{and} \\ &\text{cov}(v_{\text{right}}) \leq C_{\text{homo}} \cdot a \quad \text{and} \\ &\text{cov}(v_{\text{left}}) \leq C_{\text{homo}} \cdot a \quad \text{and} \\ &(\text{bub}(V'_u) = 0 \text{ or } \text{bub}(V'_w) = 0) \end{aligned}$$

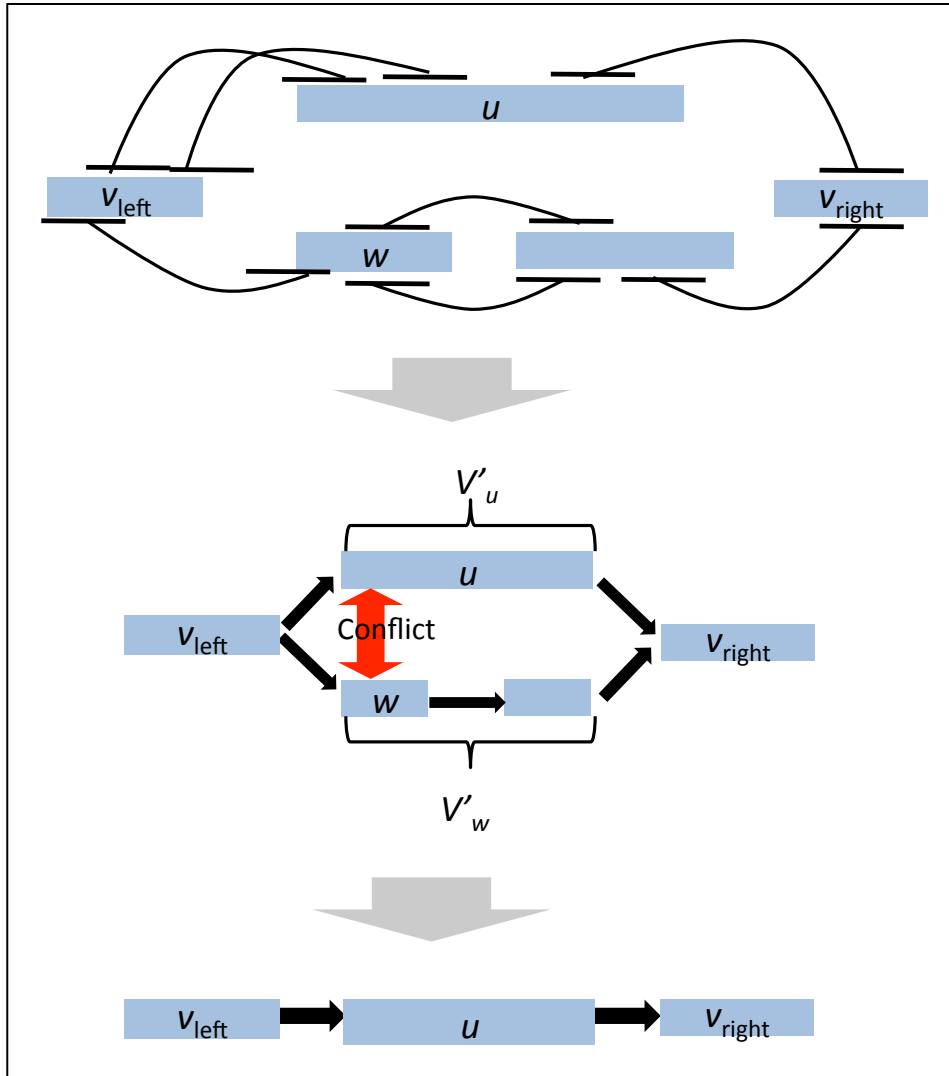

**Supplemental Figure 15. Bubble removal in the scaffold graph**

Nodes  $u$  and  $w$  are conflicting.  $V'_u$  has a higher coverage than the scaffolds (sets of nodes), and  $V'_w$  is deleted.

### ***Branch-cut in the scaffold graph (Scaffolding)***

The variables  $V_u$  and  $V_w$  represent nodes that conflict with one another, and both are connected to the common node ( $V_{\text{root}}$ ). The definitions of  $a$ ,  $|V'|$ ,  $\text{cov}(V')$ ,  $\text{bub}(V')$ , and  $\text{edit}(V'_u, V'_w)$  are the same as defined in the section *Bubble removal in scaffold graph*. Lower-coverage scaffolds ( $V'_u$  or  $V'_w$ ) are deleted if the following condition is satisfied (Supplemental Figure 16):

$$\text{cov}(V_{\text{root}}) \leq 1.5a \text{ and}$$

$$\max(\text{cov}(V_u), \text{cov}(V_w)) < 0.75a \text{ and}$$

$$\text{bub}(V_u) = 0 \text{ and}$$

$$\text{bub}(V_w) = 0$$

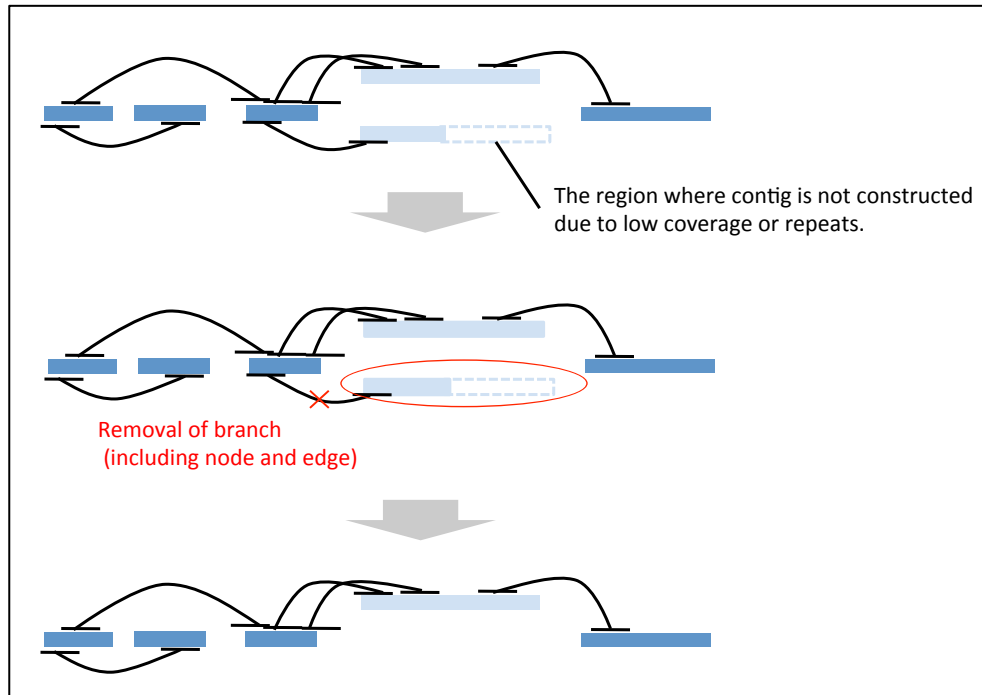

**Supplemental Figure 16. Branch-cut in scaffolding**

### ***Filling gaps in scaffolding (Scaffolding)***

After contigs (nodes) are ordered, Platanus examines whether adjacent contigs ( $v$  and  $u$ ) possess common sequences.

If  $o(v, u) \geq o_{\min}$  and  $d(v, u) - x(v, u) < o$ , the gap between  $v$  and  $u$  is filled with the common sequence.  $o_{\min}$  is the minimum overlap length (default, 32).

[ $o$ : overlap tolerance described above, in the section *Conflict of nodes (Scaffolding)*].

$x(v, u)$ : length of exact match between ends of  $v$  and  $u$ .

$d(v, u)$ : estimated distance between  $v$  and  $u$ .

### ***Masking contig ends (Scaffolding)***

Before generating the scaffold sequences, identities and overlaps between ends of adjacent contigs are examined. The variable  $o_{\min}$  represents the minimum length threshold (default, 32). If the adjacent pair of contigs possesses similar ends (identity  $\geq 0.95$ ; length  $\geq o_{\min}$ ) or the estimated distance has a negative value, both ends are masked with 'N's. The length of 'N's corresponds to the length of similar ends or overlaps. This step is intended to prevent the generation of false tandem repeats.



### ***Check of scaffolds using long-insert libraries (Scaffolding)***

After scaffolding is performed using one of the libraries, resulting scaffolds are checked using longer-insert libraries. The check is performed if the sum of physical coverage (insert-size  $\times$  number-of-mapped-pairs / total-contig-length) of longer-insert libraries is greater than that of previously used shorter-insert libraries. For each of the gaps in scaffolds, Platanus judges whether there exists a misassembly and splits the scaffold if all of following conditions below (1–4) are satisfied (Supplemental Figure 17).

$s$  : The number of paired reads spanning the gap.

$s_{\text{exp}}$  : Expected number of paired reads spanning the gap.

$n_{\text{min}}$  : Constant value (default, 3).

- (1)  $s < n_{\text{min}}$
- (2)  $s/s_{\text{exp}} < 0.1$
- (3)  $s_{\text{exp}} > 1$
- (4) There are alternative links (number-of-paired-reads  $\geq n_{\text{min}}$ ) relating to contigs that are adjacent to the gap.

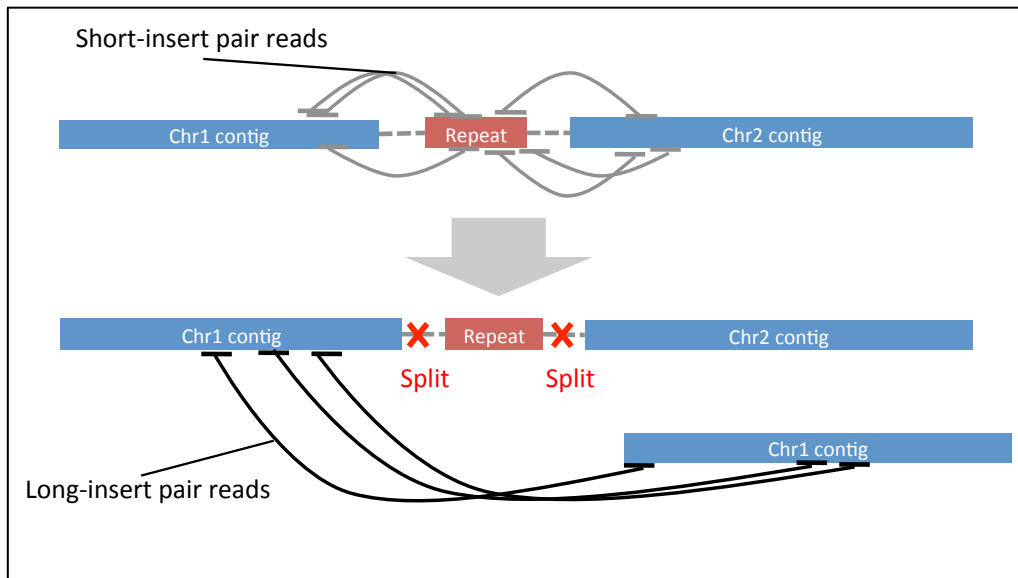

**Supplemental Figure 17. Check of scaffolds using long-insert libraries**

### ***Collection of reads in gap-close (Gap-close)***

The program "Gap-close" closes gaps in scaffolds using paired-end (mate-pair) libraries. First, reads are mapped into scaffolds in the same manner as scaffolding. Means and standard deviations of insert sizes are also calculated. When one of the paired reads is mapped, the position of the counterpart is estimated, assuming that the insert size equals the mean. A read is related to a gap if both of the following two conditions are satisfied (Supplemental Figure 18):

$h_{\text{left}}$ : Estimated leftmost position of a read.

$h_{\text{right}}$ : Estimated rightmost position of a read.

$g_{\text{left}}$ : Leftmost position of a gap.

$g_{\text{right}}$ : Rightmost position of a gap.

$\sigma$ : Standard deviation of insert size of a library.

$$(1) \ g_{\text{left}} - 3\sigma \leq h_{\text{right}}$$

$$(2) \ h_{\text{left}} \leq g_{\text{right}}$$

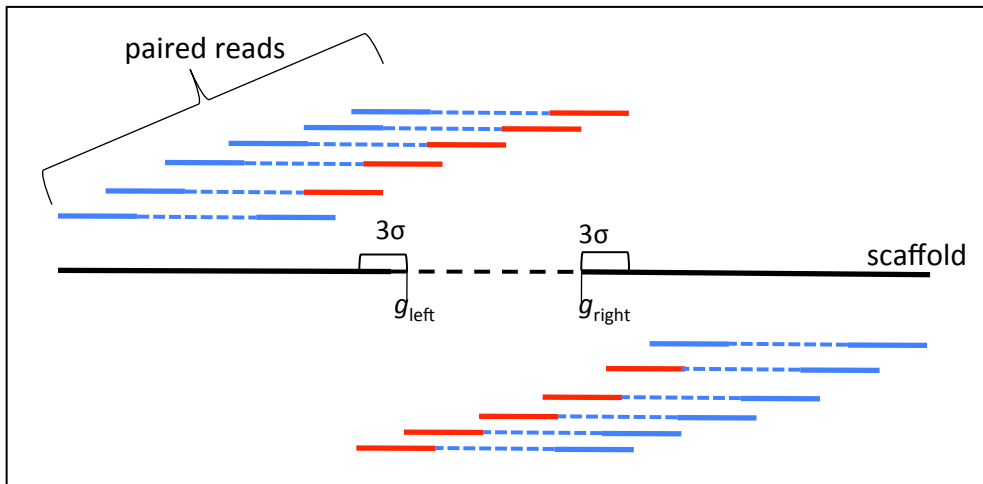

**Supplemental Figure 18. Collection of gap-covering reads**

Blue and red lines are paired reads. Black line is a scaffold. Dashed lines represent gaps.

Red lines are related to a gap of the scaffold.

$g_{\text{left}}$ : Leftmost position of a gap in a scaffold.

$g_{\text{right}}$ : Rightmost position of a gap in a scaffold.

$\sigma$ : Standard deviation of a library.

### ***Gap-closing with assembled contigs (Gap-close)***

Collected reads are assembled using the de Bruijn graph. The algorithm is similar to contig-assembly, although differences do exist. The strand directions of reads are determined from the paired-end information. Therefore, a  $k$ -mer and its reverse complement are distinguishable. Several steps are simplified in order to maintain the speed. Assembly is performed using two fixed  $k$  values (24 and 72). Minimum coverage of  $k$ -mers is also a fixed value (3). After contigs are generated from de Bruijn graph, overlaps between the end of a contig and the side of a gap are sought. If both ends of a contig have overlaps that are greater than the threshold (default, 32), the gaps are closed using the sequence of the contig. In this case, if a pair of ends has similarity greater than the threshold (default, 0.95), a gap is filled with the contig (Supplemental Figure 19). In addition, after de Bruijn graph-based closing, Platanus applies an overlap-layout-consensus algorithm to the remaining gaps. In this step, overlaps of length  $\geq 32$  and edit distance  $\leq 1$  between reads are used. Like scaffolding, libraries are used from short-insert to long-insert libraries. In the final analysis, all libraries are used simultaneously.

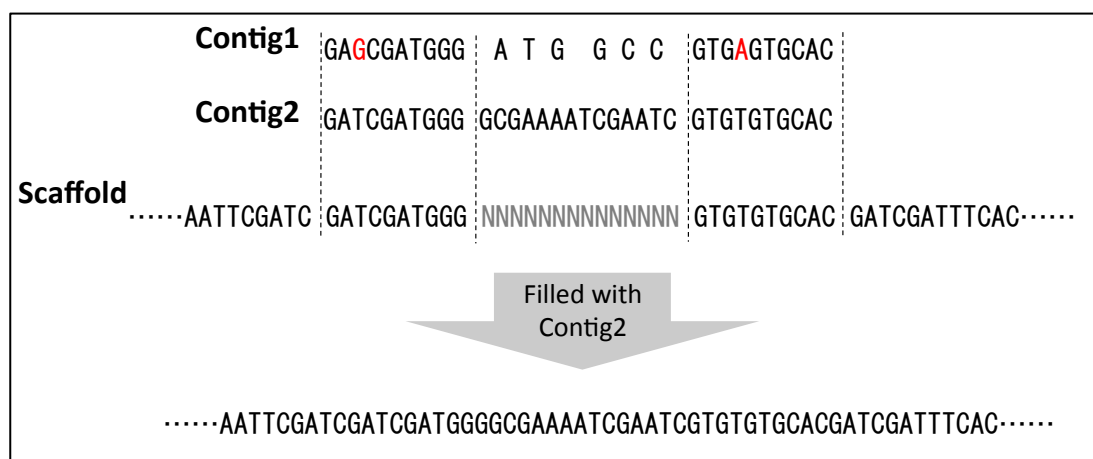

**Supplemental Figure 19. Gap filling with a contig**

In this figure, the minimum overlap length is 8. In the overlap between the contig and gap-neighboring region, mismatches are represented as red characters. A gap in a scaffold is represented as a sequence of N. Overlap of contig2 indicates a higher similarity and the gap is filled with contig2.

### **Pre-process of reads**

We trimmed adaptor sequences and/or low-quality regions in reads. The pre-processed reads were entered as input into all assemblers.

Adaptor sequences are searched using a seed size of 11 bp. If an alignment length of  $\geq 30$  bp is discovered, the aligned region and the outside regions are excluded.

To trim low-quality regions, the threshold of quality value,  $q_{\min}$ , is set to 15. Starting from both 5' and 3' ends, the outside regions are trimmed if the quality value is less than 15. Trimming finishes if the run of high-quality bases occurs (quality values  $\geq q_{\min}$ ), for which length  $\geq 11$ .

### **Filtering of mate-pair libraries**

For mate-pair libraries, PCR duplicates and read pairs that have abnormally short insert sizes were excluded. Mate-pairs were mapped on the sequences (*C. elegans*, reference; others, scaffolds assembled by Platanus using only paired-end libraries), using Bowtie2 (Langmead and Salzberg 2012). For each set of pairs that have common mapping position of 5' ends, the one that possesses the highest mapping-quality remains, while the remainder are excluded. In addition, pairs whose insert sizes (inferred from mapping results) are less than half the nominal insert size are also excluded. Resulting mate-pair libraries were input into all assemblers.

### **Pre-process of reads specific for snake of Assemblathon2**

For mate-pair libraries with insert-sizes of 2 kb, 4 kb, and 10 kb, there exist internal sequences (CAGTACTG) corresponding to ligation points in circular DNA fragments. We trimmed the region from this 8-bp sequence to the 3' end before other pre-processing steps.

## **Pre-process of reads specific for fish of Assemblathon2**

For the fosmid-end library (insert size, 40 kb), we extracted the sub-sequences corresponding to the 5–76 position in reads before other pre-process steps. Only these regions represented the genomic sequences, according to the webpage of Assemblathon2.

## **Parameter optimization for assemblers**

For the benchmarks of *C. elegans*, *S. venezuelensis*, and oyster, we optimized several parameters (e.g., the *k*-mer length and merge level). For each dataset, the settings that generated the largest scaffold NG50 sizes were selected. Values for means and standard deviations of insert sizes are entered as input in the following manner: for *C. elegans*, estimated values using reference sequence; for other species, nominal values.

Note that Platanus automatically estimates the means and standard deviations of insert sizes, except in the case of fish data. For all assemblers, the options related to the number of threads were set to 32.

### **• Platanus**

All parameters were set to the default, except “–m 100” for the Contig-assembly of the oyster data. The value of –m only affects execution time and memory usage. For Contig-assembly, paired-ends were entered as input. For Scaffolding and Gap-close, all libraries were entered as input. The sole exception was the assembly of fish contigs; all libraries entered as input for Contig-assembly and insert-sizes were specified as nominal sizes in Scaffolding.

### **• SOAPdenovo2**

We specified –K values from 21 to 91 (with a step size of 10), and –M option was set as 1 or 3. GapCloser (version: 1.12) was applied to the SOAPdenovo2 outputs ("out.scafSeq") using default parameters. For contig assembly, paired-ends were entered as input. For the other steps, all libraries were entered as input.

- ALLPATHS-LG

The option of PrepareAllPathsInputs.pl was set as “PLOIDY=2” for diploid samples.

- Velvet

The -k option was set from 21 to 91 (with a step size of 10).

- MaSuRCA

All parameters except “JF\_SIZE” were set in an identical manner as the example file. JF\_SIZE only affects execution time and memory usage, and was set as follows:

*C. elegans* and *S. venezuelensis*: JF\_SIZE=1000000000.

Oyster: JF\_SIZE=10000000000.

### ***De novo* assembly of oyster RNA-seq data**

Paired-end libraries from 13 samples and single-end libraries from 99 samples were preprocessed in the same way as genomic data (Supplemental Methods, Pre-process of reads). All preprocessed libraries (paired-end: 44.6 Gbp, single-end: 76.2 Gbp) were input into Trinity assembler (Grabherr et al. 2011) with default setting. Resulting RNA-contigs whose lengths  $\geq 500$  bp were used for the validation of assemblies. The total size, number, and average length of the RNA-contigs were 56,540,774 bp, 40,503 bp, and 1,396bp, respectively.

## Supplemental Information

### Details of sequencing data sets

Details of sequencing data sets using in this paper are shown in Supplemental Table 1.

**Supplemental Table1. Details of sequencing data sets**

| Species                         | <i>Caenorhabditis elegans</i> (nematode worm) |      |       |  |  |  |  |
|---------------------------------|-----------------------------------------------|------|-------|--|--|--|--|
| Genome size (bp)                | 100.3 M                                       |      |       |  |  |  |  |
| Insert size (bp)                | 230                                           | 420  | 4,660 |  |  |  |  |
| Read length (raw) (bp)          | 110                                           | 110  | 100   |  |  |  |  |
| Total size (raw) (bp)           | 15.1G                                         | 7.2G | 13.9G |  |  |  |  |
| Read length (preprocessed) (bp) | 107                                           | 106  | 87    |  |  |  |  |
| Total size (preprocessed) (bp)  | 7.2G                                          | 6.8G | 2.8G  |  |  |  |  |

| Species                         | <i>Strongyloides venezuelensis</i> (nematode worm) |      |      |  |  |  |  |
|---------------------------------|----------------------------------------------------|------|------|--|--|--|--|
| Genome size (bp)                | 57.7M                                              |      |      |  |  |  |  |
| Insert size (bp)                | 200                                                | 450  | 3400 |  |  |  |  |
| Read length (raw) (bp)          | 110                                                | 100  | 100  |  |  |  |  |
| Total size (raw) (bp)           | 2.9G                                               | 5.2G | 5.3G |  |  |  |  |
| Read length (preprocessed) (bp) | 104                                                | 96   | 69   |  |  |  |  |
| Total size (preprocessed) (bp)  | 2.7G                                               | 5.0G | 3.6G |  |  |  |  |

| Species                         | <i>Crassostrea gigas</i> (oyster) |       |       |       |       |        |        |
|---------------------------------|-----------------------------------|-------|-------|-------|-------|--------|--------|
| Genome size (bp)                | 565.7M                            |       |       |       |       |        |        |
| Insert size (bp)                | 170                               | 500   | 800   | 2000  | 5000  | 10,000 | 20,000 |
| Read length (raw) (bp)          | 90                                | 90    | 90    | 90    | 90    | 90     | 90     |
| Total size (raw) (bp)           | 36.3G                             | 18.7G | 18.5G | 50.7G | 16.6G | 18.8G  | 25.7G  |
| Read length (preprocessed) (bp) | 86                                | 84    | 82    | 71    | 82    | 66     | 60     |
| Total size (preprocessed) (bp)  | 34.7G                             | 17.6G | 17.0G | 29.7G | 4.2G  | 2.0G   | 2.6G   |

| Species                         | <i>Melopsittacus undulates</i> (bird) |       |       |       |       |        |        |        |
|---------------------------------|---------------------------------------|-------|-------|-------|-------|--------|--------|--------|
| Genome size (bp)                | 1085.2M                               |       |       |       |       |        |        |        |
| Insert size (bp)                | 220                                   | 500   | 800   | 2,000 | 5,000 | 10,000 | 20,000 | 40,000 |
| Read length (raw) (bp)          | 150                                   | 150   | 150   | 90    | 90    | 90     | 90     | 90     |
| Total size (raw) (bp)           | 48.4G                                 | 47.2G | 43.1G | 47.6G | 35.0G | 17.0G  | 16.1G  | 15.7G  |
| Read length (preprocessed) (bp) | 135                                   | 128   | 115   | 82    | 81    | 79     | 78     | 65     |
| Total size (preprocessed) (bp)  | 43.6G                                 | 40.5G | 33.0G | 26.0G | 15.7G | 7.3G   | 3.7G   | 1.7G   |

| Species                         | <i>Boa constrictor constrictor</i> (snake) |       |       |        |
|---------------------------------|--------------------------------------------|-------|-------|--------|
| Genome size (bp)                | 1431.5M                                    |       |       |        |
| Insert size (bp)                | 400                                        | 2,000 | 4,000 | 10,000 |
| Read length (raw) (bp)          | 121                                        | 101   | 101   | 101    |
| Total size (raw) (bp)           | 136.0G                                     | 25.1G | 17.4G | 20.5G  |
| Read length (preprocessed) (bp) | 118                                        | 65    | 68    | 75     |
| Total size (preprocessed) (bp)  | 132.1G                                     | 14.3G | 1.0G  | 6.5G   |

  

| Species                         | <i>Maylandia zebra</i> (fish) |       |       |       |       |        |        |  |
|---------------------------------|-------------------------------|-------|-------|-------|-------|--------|--------|--|
| Genome size (bp)                | 915.0M                        |       |       |       |       |        |        |  |
| Insert size (bp)                | 180                           | 2,500 | 5,000 | 7,000 | 9,000 | 11,000 | 40,000 |  |
| Read length (raw) (bp)          | 101                           | 101   | 101   | 101   | 101   | 101    | 101    |  |
| Total size (raw) (bp)           | 60.4G                         | 71.7G | 14.5G | 16.0G | 14.9G | 11.6G  | 3.9G   |  |
| Read length (preprocessed) (bp) | 80                            | 62    | 62    | 58    | 52    | 58     | 50     |  |
| Total size (preprocessed) (bp)  | 48.0G                         | 27.7G | 3.8G  | 3.8G  | 5.1G  | 2.0G   | 1.0G   |  |

For "preprocessed" data, adaptor sequences and low quality regions (threshold of quality value: 15) are trimmed and PCR-duplicate if mate-pairs are excluded.



### 17-mer frequency analysis

Original (pre-normalized) 17-mer frequency distributions of *S. venezuelensis* and oyster are shown in Supplementary Figure 20 and 17-mer frequency distributions of 3 species (bird, snake, fish) are shown in Supplementary Figure 21.

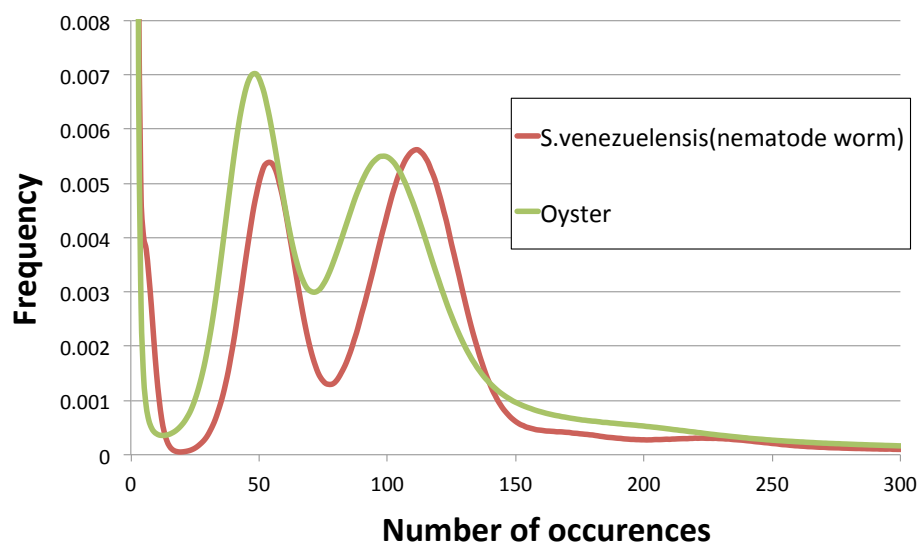

**Supplemental Figure 20. Distribution of the number of 17-mer occurrences**

Real data from highly heterozygous samples, *S. venezuelensis* and oyster.

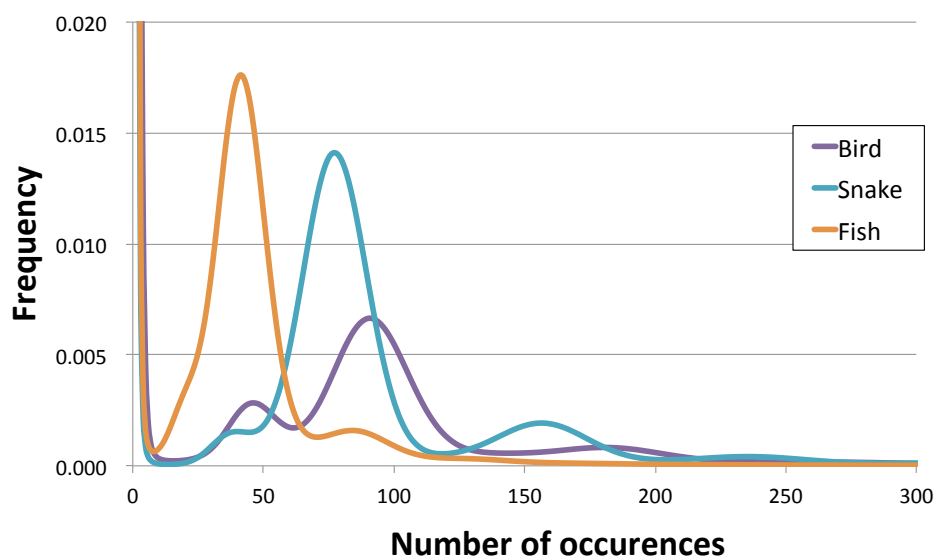

**Supplemental Figure 21. Distribution of the number of 17-mer occurrences**

Data from three species of Assemblathon2.

### Details of statistics of *C. elegans* assemblies

Details of statistics of *C.elegans* assemblies are shown in Supplemental Table 2 and Supplemental Figure 22.

**Supplemental Table 2. Details of statistics of *C. elegans* assemblies**

(A) Corrected Scaffold NG50 (bp)

| Heterozygosity (%) | Corrected Scaffold NG50 (bp) |             |         |             |         |
|--------------------|------------------------------|-------------|---------|-------------|---------|
|                    | Platanus                     | ALLPATHS-LG | MaSuRCA | SOAPdenovo2 | Velvet  |
| 0.0                | 361,608                      | 402,062     | 210,683 | 394,556     | 123,438 |
| 0.1                | 388,028                      | 368,779     | 209,917 | 403,115     | 104,756 |
| 0.2                | 411,618                      | 228,033     | 229,808 | 403,701     | 104,352 |
| 0.3                | 392,137                      | 82,457      | 255,210 | 372,430     | 60,253  |
| 0.5                | 366,498                      | 5,994       | 263,146 | 288,181     | 51,097  |
| 1.0                | 368,857                      | 4,928       | 288,752 | 234,395     | 34,491  |
| 1.5                | 355,057                      | 4,999       | 287,646 | 202,140     | 2,099   |
| 2.0                | 341,914                      | 5,178       | 240,778 | 150,059     | 1,932   |

(B) Scaffold NG50 (bp)

| Heterozygosity (%) | Scaffold NG50 (bp) |             |         |             |         |
|--------------------|--------------------|-------------|---------|-------------|---------|
|                    | Platanus           | ALLPATHS-LG | MaSuRCA | SOAPdenovo2 | Velvet  |
| 0.0                | 478,744            | 466,658     | 420,694 | 507,513     | 424,862 |
| 0.1                | 490,975            | 431,770     | 482,920 | 497,363     | 332,019 |
| 0.2                | 535,328            | 375,904     | 430,011 | 489,092     | 340,229 |
| 0.3                | 545,914            | 219,404     | 460,620 | 441,950     | 286,218 |
| 0.5                | 497,387            | 127,365     | 475,513 | 353,955     | 251,000 |
| 1.0                | 511,190            | 91,413      | 466,806 | 280,050     | 209,807 |
| 1.5                | 516,958            | 73,543      | 472,079 | 252,105     | 178,132 |
| 2.0                | 580,832            | 86,979      | 351,406 | 212,590     | 162,062 |

(C) Corrected Contig NG50 (bp)

| Heterozygosity (%) | Corrected Contig NG50 (bp) |             |         |             |        |
|--------------------|----------------------------|-------------|---------|-------------|--------|
|                    | Platanus                   | ALLPATHS-LG | MaSuRCA | SOAPdenovo2 | Velvet |
| 0.0                | 48,054                     | 47,111      | 40,248  | 45,927      | 17,739 |
| 0.1                | 48,250                     | 46,131      | 41,645  | 43,026      | 12,263 |
| 0.2                | 47,179                     | 33,243      | 41,819  | 34,822      | 7,831  |
| 0.3                | 43,969                     | 15,142      | 42,900  | 25,294      | 9,474  |
| 0.5                | 43,196                     | 2,746       | 42,700  | 23,831      | 7,652  |
| 1.0                | 39,291                     | 1,316       | 44,746  | 16,784      | 4,231  |
| 1.5                | 35,786                     | 1,057       | 42,593  | 9,419       | 707    |
| 2.0                | 34,030                     | 1,649       | 38,465  | 4,013       | 610    |

(D) Contig NG50 (bp)

| Heterozygosity (%) | Contig NG50 (bp) |             |         |             |        |
|--------------------|------------------|-------------|---------|-------------|--------|
|                    | Platanus         | ALLPATHS-LG | MaSuRCA | SOAPdenovo2 | Velvet |
| 0.0                | 66,446           | 67,596      | 74,686  | 170,395     | 19,084 |
| 0.1                | 65,717           | 66,289      | 77,050  | 155,501     | 12,988 |
| 0.2                | 61,969           | 45,370      | 76,439  | 144,468     | 8,135  |
| 0.3                | 59,795           | 19,629      | 79,194  | 141,590     | 10,174 |
| 0.5                | 53,873           | 2,807       | 80,813  | 117,418     | 8,142  |
| 1.0                | 48,090           | 1,358       | 84,827  | 103,677     | 4,445  |
| 1.5                | 42,013           | 1,103       | 75,918  | 90,768      | 766    |
| 2.0                | 39,915           | 1,810       | 62,656  | 60,761      | 666    |

(E) Total size of scaffolds  $\geq 500$  bp

| Heterozygosity (%) | Total size (bp) |             |             |             |             |
|--------------------|-----------------|-------------|-------------|-------------|-------------|
|                    | Platanus        | ALLPATHS-LG | MaSuRCA     | SOAPdenovo2 | Velvet      |
| 0.0                | 97,938,690      | 98,864,571  | 97,742,565  | 99,132,377  | 99,382,943  |
| 0.1                | 98,876,811      | 99,521,025  | 99,171,512  | 99,215,054  | 99,851,591  |
| 0.2                | 98,876,741      | 102,601,583 | 98,996,688  | 99,504,741  | 101,204,194 |
| 0.3                | 98,920,320      | 114,954,930 | 99,210,505  | 99,969,847  | 99,482,862  |
| 0.5                | 98,916,151      | 153,369,255 | 99,925,896  | 99,196,053  | 100,074,381 |
| 1.0                | 99,223,085      | 163,953,538 | 100,913,677 | 99,086,653  | 103,773,061 |
| 1.5                | 99,706,135      | 155,053,323 | 103,830,661 | 100,438,152 | 107,239,890 |
| 2.0                | 100,454,422     | 170,519,463 | 105,340,084 | 99,546,387  | 110,798,448 |

(F) Number of errors (inversion + translocation + relocation)

| Heterozygosity (%) | Number of errors (bp) |             |         |             |        |
|--------------------|-----------------------|-------------|---------|-------------|--------|
|                    | Platanus              | ALLPATHS-LG | MaSuRCA | SOAPdenovo2 | Velvet |
| 0.0                | 367                   | 272         | 900     | 407         | 1,490  |
| 0.1                | 346                   | 259         | 878     | 441         | 2,044  |
| 0.2                | 333                   | 276         | 892     | 450         | 1,999  |
| 0.3                | 324                   | 335         | 911     | 442         | 3,575  |
| 0.5                | 325                   | 593         | 881     | 941         | 4,206  |
| 1.0                | 290                   | 542         | 895     | 1,226       | 6,285  |
| 1.5                | 300                   | 498         | 861     | 1,304       | 35,440 |
| 2.0                | 256                   | 496         | 774     | 1,839       | 36,840 |

(A)

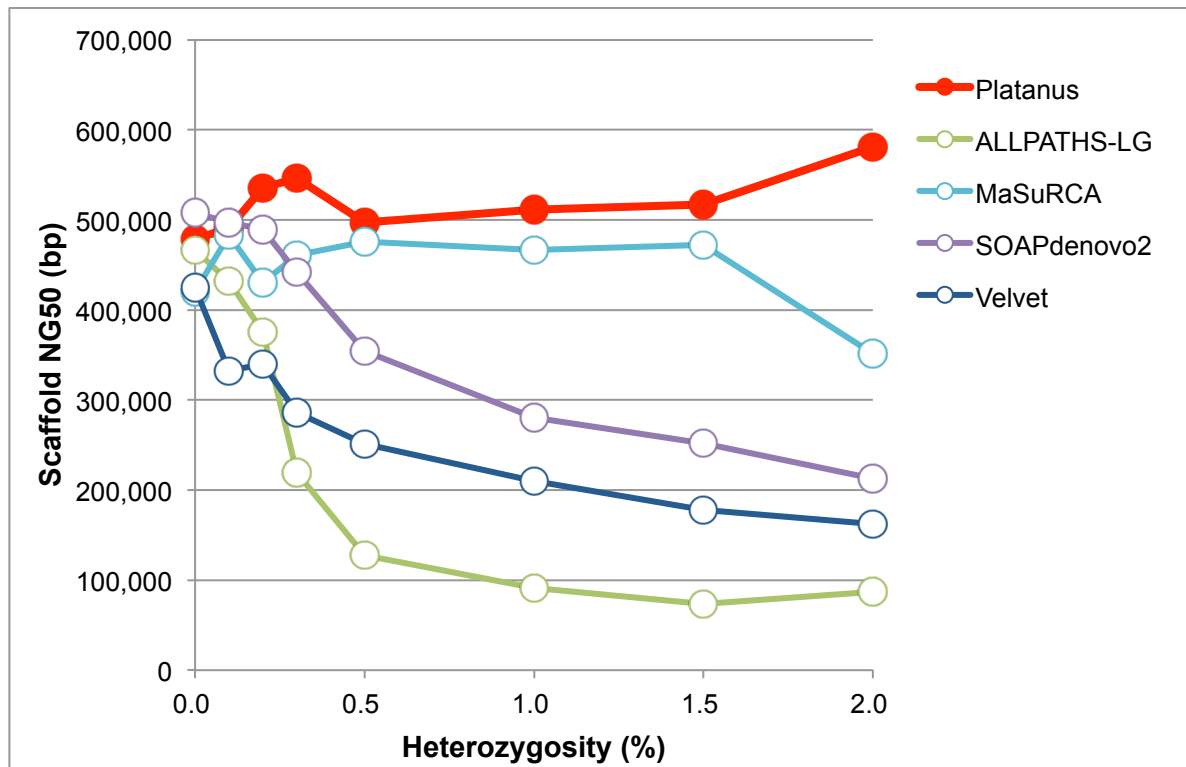

(B)

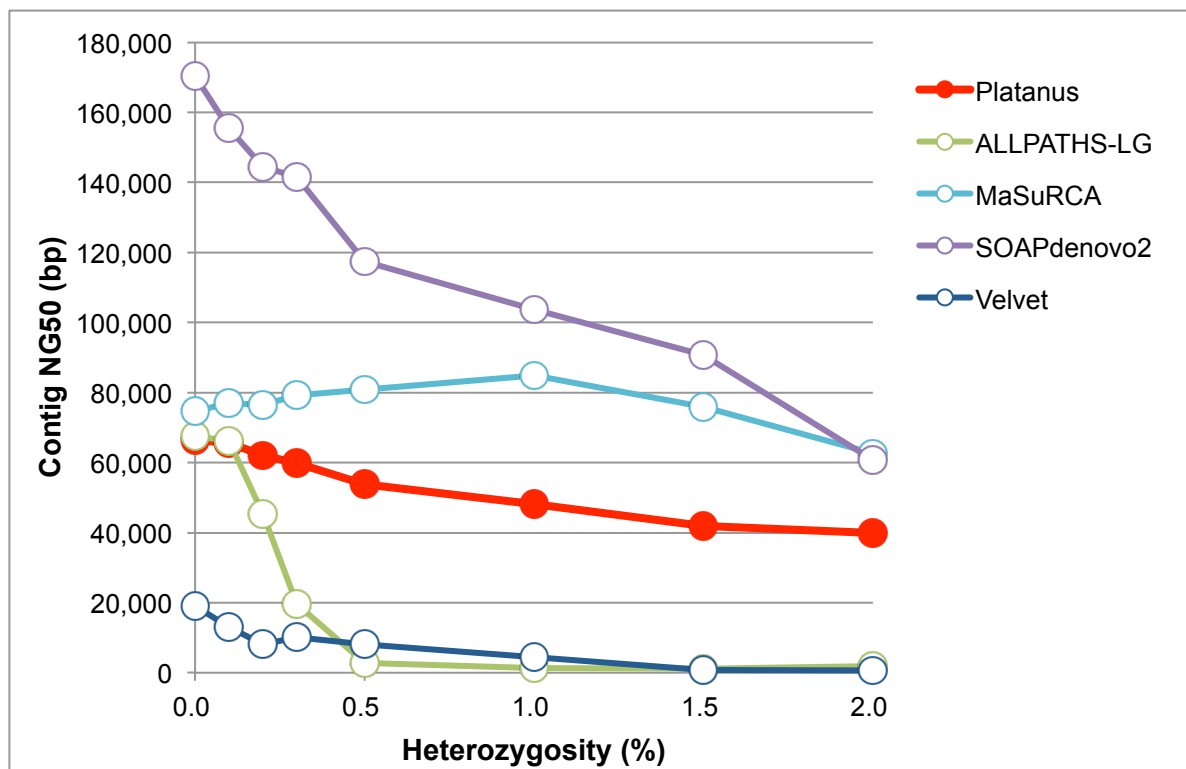

(C)

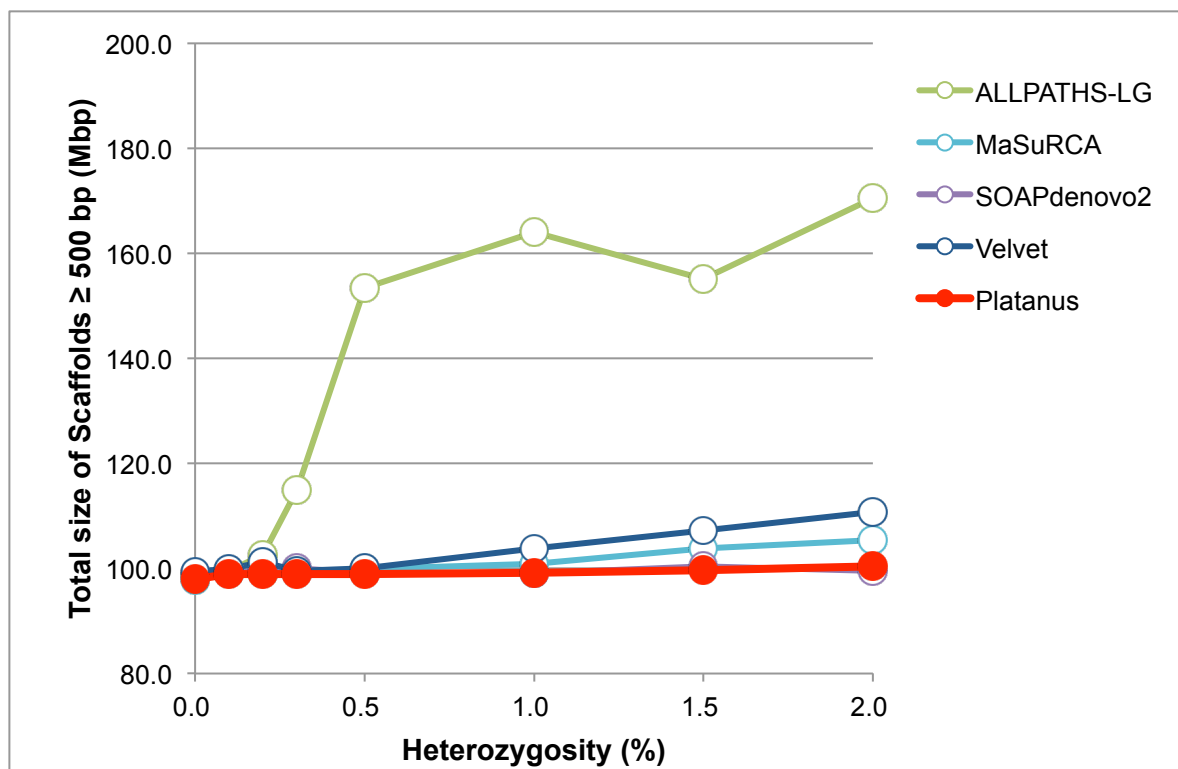

**Supplemental Figure 22. Results of the benchmarks of heterozygosity simulations (*C. elegans*)**

(A) Scaffold NG50. (B) Contig NG50. (C) Total sizes of the assemblies ( $\geq 500$  bp).

### Comparison between simulated and estimated heterozygosity

By mapping original and each simulated paired-end reads onto the reference genome (*C. elegans* Sequencing Consortium 1998), the heterozygosity of each simulated data was calculated. These results are shown in Supplemental Table 3.

**Supplemental Table 3. Comparison between simulated and estimated heterozygosity (*C. elegans*)**

| Simulated heterozygosity (%) | Calculated heterozygosity (%) |
|------------------------------|-------------------------------|
| 0.0                          | $1.85 \times 10^{-3}$         |
| 0.1                          | 0.102                         |
| 0.2                          | 0.202                         |
| 0.3                          | 0.302                         |
| 0.5                          | 0.501                         |
| 1.0                          | 0.999                         |
| 1.5                          | 1.49                          |
| 2.0                          | 1.95                          |

### Total size of assembled scaffolds

In the assembly of simulated heterozygous *C.elegans* genomes, the total size of ALLPATHS-LG approaches nearly twice the genome size ( $2 \times 100$  Mbp) (Supplemental Figure 22). We were aware of the possibility that ALLPATHS-LG constructed haplotype sequences separately. If so, linkage information can be obtained from the variants, which could be suitable for the post analysis. To investigate the existence of haplotype-sensitive assembly, we first mapped all 200 bp fragments, clipping from each assembler's scaffolds (2.0% heterozygosity) to the simulated diploid reference genome sequences with 2.0% heterozygosity, which were constructed *in silico*. We then detected deviations of each fragment from the haplotypes and finally identified the haplotype junctions (i.e., the borders between different haplotypes). As a result of this process, all assemblies contained such junctions (Supplemental Table 4). Supplemental Figure 23 provides an example of haplotype changes in the 10-Kbp region. In this region, all scaffolds contained multiple junctions, and ALLPATHS-LG provided duplicated scaffolds. Indeed, 85% of the ALLPATHS-LG scaffolds possessed haplotype junctions. This result suggests that the assemblers tested in this study are not designed to construct each haplotype sequence, and that an increase of total assembly sizes is not indicative of the success of haplotype assembly. In the assembly of real highly heterozygous *S.venezuelensis* genome, the total size of ALLPATHS-LG's scaffold ( $\geq 500$  bp) was 1.06-fold comparing with the real genome size, in contrast to the 1.63-fold size in the 1.0%-heterozygous *C. elegans* test. The uneven distribution of heterozygosity may have resulted in these observed differences between the real data and the simulated data.

**Supplemental Table 4. Statistics of haplotype junctions in *C. elegans* data (heterozygosity: 2.0%)**

|                                           | Platanus | ALLPATHS-LG | MaSuRCA | SOAPdenovo2 | Velvet  |
|-------------------------------------------|----------|-------------|---------|-------------|---------|
| Number of junctions of haplotypes         | 143,359  | 92,940      | 170,172 | 184,989     | 149,030 |
| Rate of scaffolds including junctions (%) | 17.88    | 85.84       | 11.66   | 43.67       | 32.96   |
| Average interval between junctions (bp)   | 1398.9   | 2157.7      | 1178.5  | 1084.1      | 1345.7  |

Every 200 bp sequences in the scaffolds were mapped to the simulated diploid genome using Bowtie2 and assigned to one of the haplotypes. Junctions were detected if adjacent fragments had different haplotypes. Gaps or variant-free regions were skipped.

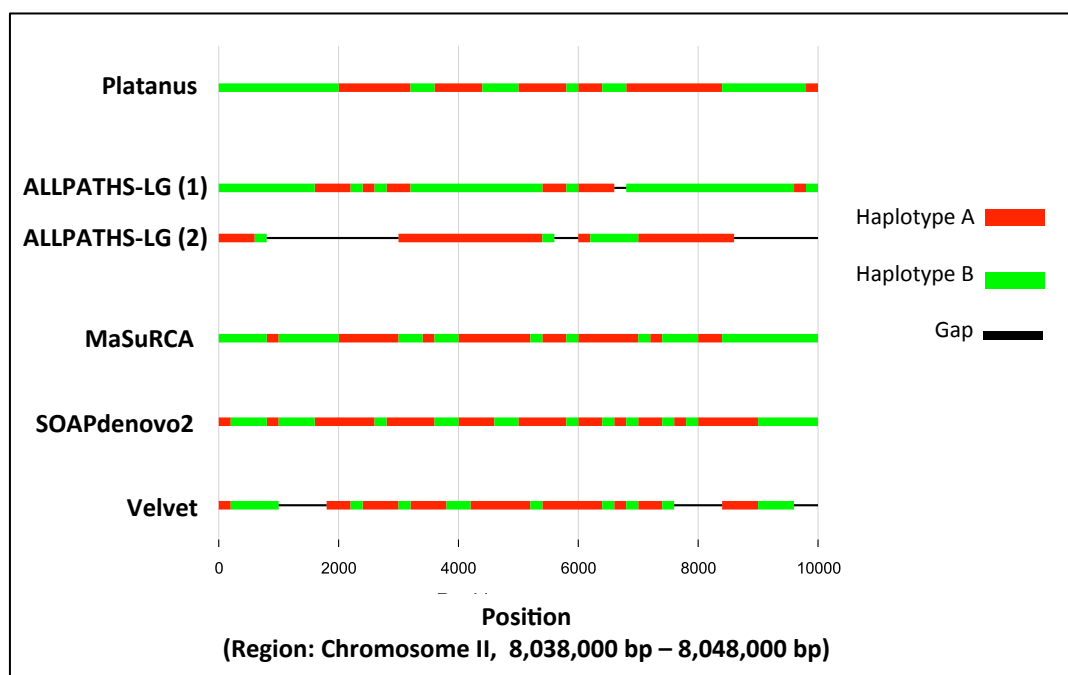

**Supplemental Figure 23. Example of the junctions of haplotypes in *C. elegans* assemblies (heterozygosity: 2.0%)**

For the benchmark of 2.0%-heterozygous *C. elegans* data, scaffolds corresponding to a certain region (size: 10 kbp) are displayed. All 200 bp of the scaffolds are mapped on the simulated diploid genome, assigned to one of the haplotypes, and the scaffold regions are differentiated (red or green) according to haplotypes. For this region, ALLPATHS-LG produces duplicated scaffolds, and both are shown.



### Example of “bubble removal” in scaffolding (*S. venezuerensis*)

we provide the example of “bubble removal” in scaffolding (Fig. 4A, B) using a dot plot analysis by nucmer alignment program. For the alignment of two fosmids covering the region where the bubble was removed (Fig. 4B), a 209-bp indel was present with 2.09% heterozygosity level. The scaffold generated by Platanus (ContigP1 – ContigA1 – ContigN1) was correctly aligned to one of the fosmids, corresponding to the diagonal line shown in Supplemental Figure 24A. We replaced the bubble region contig (ContigA1) in the scaffold with the removed contig sequence (ContigB1), and the resulting scaffold (ContigP1 – ContigB1 – ContigN1) was aligned to the fosmid of another haplotype with no gap (Supplemental Figure 24B). These results indicate that Platanus correctly resolved the region containing a relatively large indel, many SNVs, and several small indels existed simultaneously using the bubble removal routine.

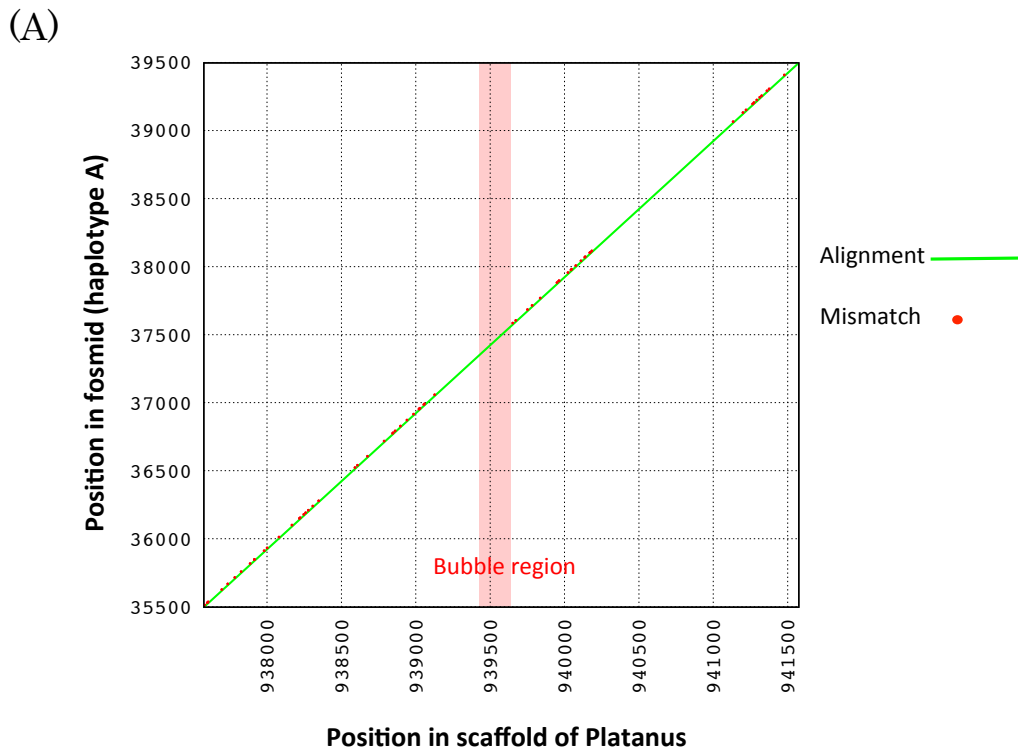

(B)

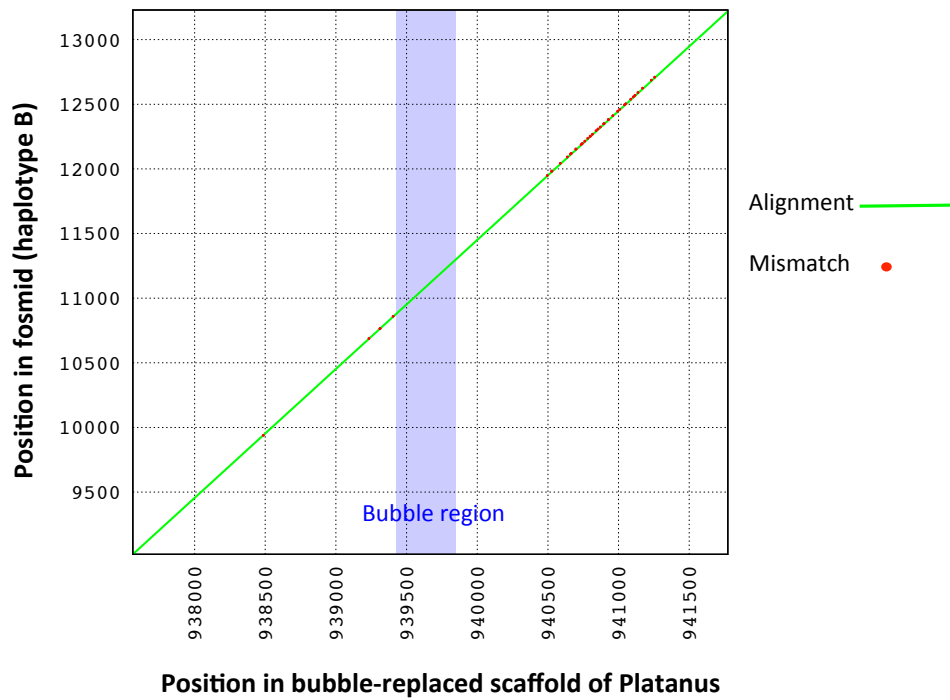

**Supplemental Figure 24. Example of a heterozygous region resolved by “bubble removal”**

- (A) Alignment dot plot between a fosmid (haplotype A) and a scaffold of Platanus. The red box indicates the region on the scaffold corresponding to the bubble (removed contig).
- (B) Alignment dot plot between a fosmid (haplotype B) and a scaffold, in which the region corresponding to the bubble is replaced with the removed sequence (removed contig).

### Example of “branch cut” in scaffolding (*S. venezuerensis*)

We provide the example of “branch cut” (Fig. 4C, D). As in the “bubble removal” example, we aligned the two fosmids covering the position of the branch cut (Fig. 4D). This algorithm was designed to resolve heterozygous regions in which the bubble structures do not appear in graphs due to complex variants, repeats, low coverage depth. Three indels were apparent whose sizes were 126 bp, 715 bp, and 1,206 bp, with high heterozygosity (1.93%). The scaffold sequence (ContigP2 – ContigA2 – ContigN2) could be aligned to one fosmid of the pair (Supplemental Figure 25), and the removed branch (size: 1,217 bp; ContigB2) matched the other fosmid, confirming the correctness of Platanus’ resolution.

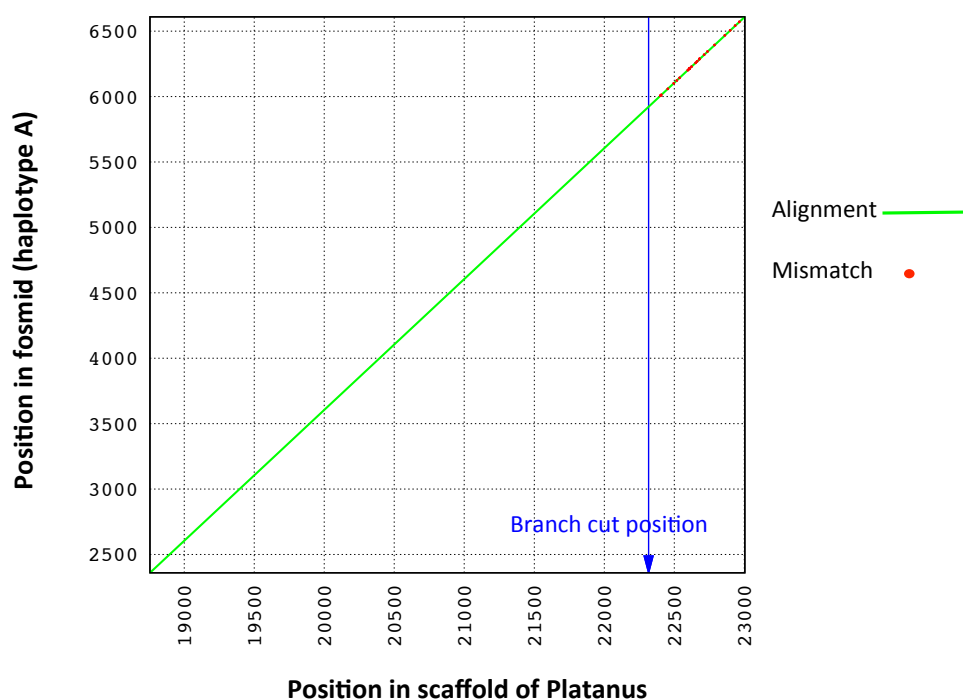

### Supplemental Figure 25. Example of a heterozygous region resolved by “branch cut”

Alignment dot plot between a fosmid (haplotype A) and a scaffold of Platanus.

### Distribution of heterozygosity across the entire *S.venezuelensis* genome

SNVs and small indels on the scaffolds were detected by mapping paired-end reads (see Methods), and heterozygosity was calculated for every 1 kbp non-overlapping window. The average heterozygosity was 0.950% and the resulting distribution of heterozygosity is shown in Supplemental Figure 26. Compared with the 1.0%-heterozygous *C. elegans* data, the *S. venezuelensis* data had an uneven distribution of heterozygosity.

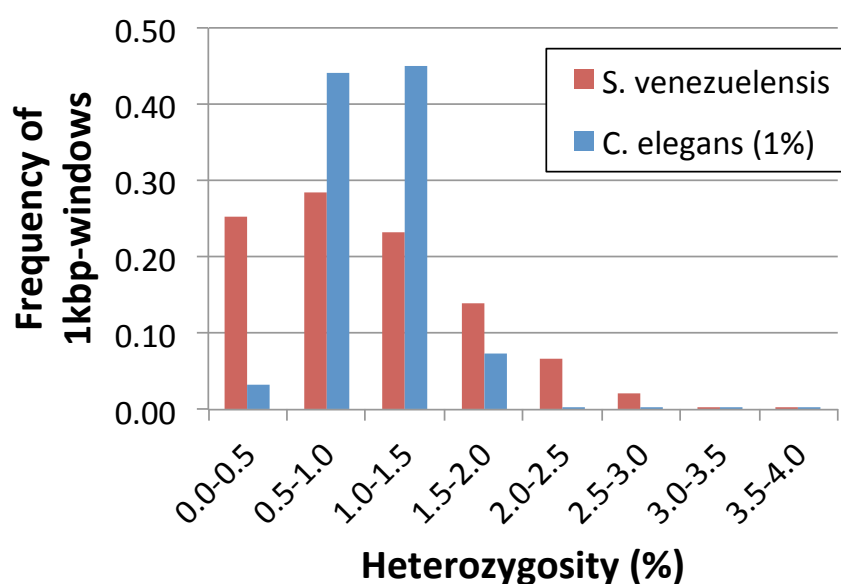

### Supplemental Figure 26. Distribution of heterozygosity on scaffolds

SNVs and small indels on Platanus' scaffolds were detected by mapping paired-ends (see Methods). Heterozygosity ((SNVs + indels) / base) was calculated for each 1 kbp window. *S. venezuelensis* data were real data, where as *C. elegans* data consisted of simulated heterozygosity (1.0%).

### Example of alignments between BAC and scaffolds in oyster genome assembling

We provide an example of the region that Platanus was able to resolve but the fosmid-based references were divided (denoted by the blue arrow in Supplemental Figure 27). In this region, Platanus removed a bubble of greater than 1 Kbp in length, corresponding to a large indel (approximately 800 bp in length). In the fosmid-based methods, each fosmid was first assembled as a haplotype sequence. Next the resulting fosmids were connected according to the overlap-layout-consensus algorithm, merging haplotypes into consensus sequences. In the first step, fosmid assembly should succeed even for highly heterozygous regions because each haplotype is assembled separately. However, complex variants can interfere with the assembly process in the next merging step. This example demonstrates that even fosmid-based methods can fail to handle highly heterozygous regions including structural variations. Platanus is designed to be able to resolve such regions in its Scaffolding step.

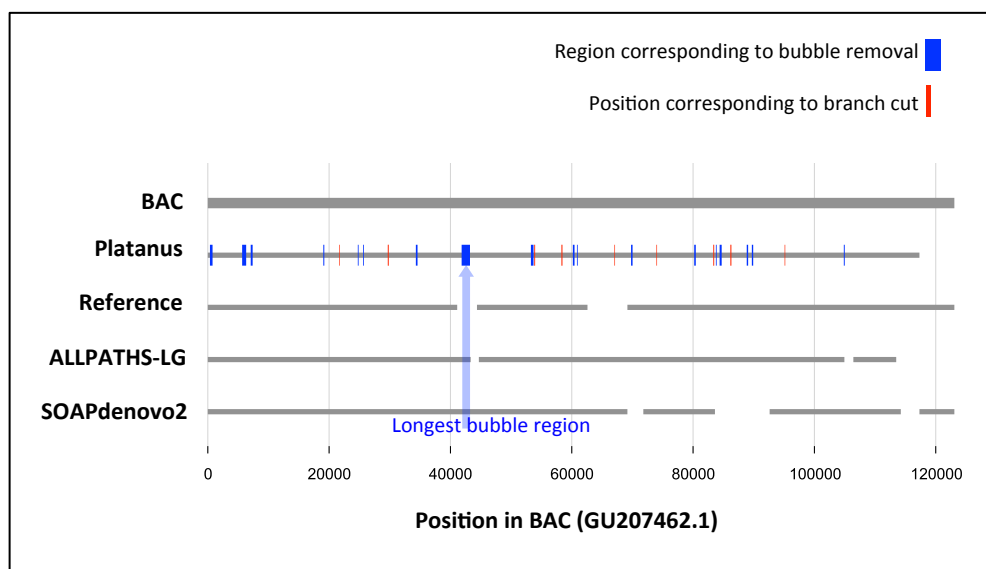

**Supplemental Figure 27. Example of alignments between BAC and scaffolds.**

Blue boxes indicate the regions corresponding to “bubble removal”. Red lines indicate the position of branch-cut. The blue arrow indicate the longest bubble-removal region in the the BAC, (see Supplemental Information). The accession code of BAC is GU207462.1.

## Comparison of scaffold-NG50 length between each assembler and Platanus

In Supplemental Table 5, comparison results between each assembler's scaffold-NG50 and Platanus' are shown.

**Supplemental Table 5. NG50 / Platanus-NG50 (Scaffold)**

|                                          | ALLPATHS-LG | MaSuRCA | SOAPdenovo2 | Velvet |
|------------------------------------------|-------------|---------|-------------|--------|
| <i>C. elegans</i> (heterozygosity: 0.0%) | 0.975       | 0.879   | 1.060       | 0.887  |
| <i>C. elegans</i> (heterozygosity: 0.1%) | 0.879       | 0.984   | 1.013       | 0.676  |
| <i>C. elegans</i> (heterozygosity: 0.2%) | 0.702       | 0.803   | 0.914       | 0.636  |
| <i>C. elegans</i> (heterozygosity: 0.3%) | 0.402       | 0.844   | 0.810       | 0.524  |
| <i>C. elegans</i> (heterozygosity: 0.5%) | 0.256       | 0.956   | 0.712       | 0.505  |
| <i>C. elegans</i> (heterozygosity: 1.0%) | 0.179       | 0.913   | 0.548       | 0.410  |
| <i>C. elegans</i> (heterozygosity: 1.5%) | 0.142       | 0.913   | 0.488       | 0.345  |
| <i>C. elegans</i> (heterozygosity: 2.0%) | 0.150       | 0.605   | 0.366       | 0.279  |
| <i>S. venezuelensis</i>                  | 0.061       | 0.642   | 0.318       | 0.062  |
| Oyster                                   | 0.404       | N/A     | 0.305       | N/A    |

### Comparison between Platanus scaffolds and fosmid-based reference in oyster genome assembling using RNA-seq mapping

For Platanus' scaffolds and the reference, there were 1,357 Platanus-specific RNA-contigs (Platanus: mapped; reference: no hits with coverage  $\geq 50\%$ ; Supplemental Table 6). In the RNA-contigs, 928 have significant hits with BLASTX (e-value  $\leq 10^{-5}$ ) in the nr database. Conversely, there were only 366 reference-specific RNA-contigs.

**Supplemental Table 6. Comparison between Platanus and RNA-mapping reference (oyster)**

|                                      | Total (bp) | Number | Average length (bp) | Number of significant-hit contigs (nr) |
|--------------------------------------|------------|--------|---------------------|----------------------------------------|
| Platanus-specific (Reference: nohit) | 1,680,407  | 1,357  | 1238.3              | 928                                    |
| Reference-specific (Platanus: nohit) | 540,263    | 366    | 1476.1              | 271                                    |

RNA-contigs (number: 40,503, total: 56,540,774 bp) were aligned to scaffolds using blat. If a RNA-contig was mapped to Platanus' scaffold (with 90% covered by a single scaffold) and no hit against the reference had a coverage  $\geq 50\%$ , that contig is considered to be "Platanus-specific" and vice versa for "Reference-specific." A "significant-hit contig" is an RNA-contig with hits of BLASTX (e-value  $\leq 10^{-5}$ ) on the nr database.

## Assembly of the Assemblathon2 data

We applied Platanus to larger genomes and compared its assembly with additional methods to confirm its versatility. We demonstrated the assemblies of three species (bird, snake, and fish) for Assemblathon2. The summaries of results for this section are shown in Table 1 and detail results are shown in Supplemental Table 7. Platanus recorded the highest values for both scaffold NG50 (bird: 21,684,294 bp, snake: 17,165,953 bp). For the snake assembly in particular, the scaffold NG50 of Platanus was unexpectedly large at more than three times the second largest value. In the fish assemblies, the scaffold NG50 of Platanus (2,371,946 bp) was the fifth largest of 17 entries. When limited to a single program's results, the scaffold NG50 of Platanus was second behind the ALLPATHS\_LG. One important feature of the fish data is the low coverage depth (52.5×) of its paired-end reads, which probably reduced Platanus' scaffold NG50 value.

**Supplemental Table 7A. Statistics of the Assemblathon2 assembly (Bird)**

| Description of assemblers |                                                                                       |                             | Assembly statistics  |                    |                  | Fosmid validation    |              |                             |
|---------------------------|---------------------------------------------------------------------------------------|-----------------------------|----------------------|--------------------|------------------|----------------------|--------------|-----------------------------|
| Team name                 | Principal software used                                                               | Type of data used           | Total (≥500bp)       | Scaffold NG50 (bp) | Contig NG50 (bp) | Top-hits-length (bp) | Identity (%) | Number of contained fosmids |
| <b>Platanus</b>           | <b>Platanus</b>                                                                       | <b>Illumina</b>             | <b>1,129,507,736</b> | <b>21,684,294</b>  | <b>56,973</b>    | <b>1,026,396</b>     | <b>99.40</b> | <b>84</b>                   |
| ABL                       | HyDA                                                                                  | Illumina, Roche-454         | 962,501,883          | 3,003              | 3,003            | 415,799              | 99.63        | 18                          |
| Allpaths                  | ALLPATHS-LG                                                                           | Illumina                    | 1,148,183,934        | 17,716,398         | 57,617           | 1,001,521            | 99.22        | 77                          |
| BCM-HGSC                  | SeqPrep, KmerFreq, Quake, BWA, Newbler, ALLPATHS-LG, Atlas-Link, Atlas-GapFill, Phrap | Illumina, Roche-454, PacBio | 1,322,103,957        | 17,484,024         | 184,968          | 995,482              | 99.40        | 80                          |
| BCM-HGSC*                 | SeqPrep, KmerFreq, Quake, BWA, Newbler, ALLPATHS-LG, Atlas-Link, Atlas-GapFill, Phrap | Illumina, Roche-454, PacBio | 1,323,179,685        | 17,488,428         | 115,689          | 992,609              | 99.44        | 80                          |
| CBCB                      | Celera assembler and PacBio Corrected Reads (PBcR)                                    | Illumina, Roche-454, PacBio | 1,219,131,251        | 2,030,397          | 116,375          | 1,021,740            | 99.34        | 81                          |
| CoBig2                    | 4Pipe4 pipeline, Seqclean, Mira, Bambus2                                              | Roche-454                   | 11,169,988           | 0                  | 0                | 30,036               | 89.25        | 0                           |
| MLK-Group                 | ABYSS                                                                                 | Illumina                    | 1,871,173,099        | 150,983            | 36,470           | 876,624              | 99.45        | 58                          |
| Meraculous                | meraculous                                                                            | Illumina                    | 1,081,601,988        | 9,834,474          | 37,061           | 975,863              | 99.43        | 71                          |
| Newbler-454               | Newbler                                                                               | Roche-454                   | 1,117,368,293        | 11,495,203         | 66,030           | 995,738              | 99.38        | 74                          |
| Phusion                   | Phusion2, SOAPdenovo, SSPACE                                                          | Illumina                    | 1,334,459,170        | 1,479,065          | 74,321           | 931,879              | 99.26        | 66                          |
| Ray                       | Ray                                                                                   | Illumina                    | 1,266,700,501        | 673,924            | 44,663           | 987,974              | 99.41        | 78                          |
| SGA                       | SGA                                                                                   | Illumina                    | 1,152,568,402        | 3,584,181          | 17,785           | 912,595              | 99.49        | 59                          |
| SOAPdenovo                | SOAPdenovo                                                                            | Illumina                    | 1,150,787,380        | 14,644,723         | 40,684           | 1,009,988            | 99.24        | 81                          |
| SOAPdenovo*               | SOAPdenovo                                                                            | Illumina                    | 1,147,593,642        | 14,617,523         | 54,932           | 1,010,089            | 99.29        | 81                          |
| SOAPdenovo**              | SOAPdenovo                                                                            | Illumina                    | 1,147,651,023        | 14,617,693         | 53,557           | 1,010,137            | 99.29        | 81                          |



**Supplemental Table 7B. Statistics of the Assemblathon2 assembly (Snake)**

| Description of assemblers |                                                                                        |                   | Assembly statistics  |                    |                  | Fosmid validation    |              |                             |
|---------------------------|----------------------------------------------------------------------------------------|-------------------|----------------------|--------------------|------------------|----------------------|--------------|-----------------------------|
| Team name                 | Principal software used                                                                | Type of data used | Total (≥500bp)       | Scaffold NG50 (bp) | Contig NG50 (bp) | Top-hits-length (bp) | Identity (%) | Number of contained fosmids |
| <b>Platanus</b>           | <b>Platanus</b>                                                                        | <b>Illumina</b>   | <b>1,441,357,474</b> | <b>17,165,953</b>  | <b>48,614</b>    | <b>368,203</b>       | <b>99.80</b> | <b>53</b>                   |
| ABYSS                     | ABYSS                                                                                  | Illumina          | 1,513,411,700        | 508,539            | 28,651           | 356,343              | 99.80        | 47                          |
| BCM-HGSC                  | SeqPrep, KmerFreq, Quake, BWA, Newbler, ALLPA THS-LG, Atlas-Link, Atlas-GapFill, Phrap | Illumina          | 1,439,656,907        | 1,563,800          | 12,727           | 333,109              | 99.51        | 39                          |
| CRACS                     | ABYSS, SSPACE, Bowtie, and FASTX                                                       | Illumina          | 1,514,104,169        | 738,101            | 16,852           | 344,776              | 99.76        | 39                          |
| Curtain                   | SOAPdenovo, fastx_toolkit, bwa, samtools, velvet, curtain                              | Illumina          | 1,497,321,002        | 58,954             | 4,476            | 279,969              | 99.34        | 25                          |
| GAM                       | GAM, CLC and ABYSS                                                                     | Illumina          | 1,367,480,854        | 19,350             | 4,499            | 306,517              | 99.22        | 29                          |
| Meraculous                | meraculous                                                                             | Illumina          | 1,426,938,655        | 1,247,790          | 34,344           | 356,103              | 99.85        | 47                          |
| PRICE                     | PRICE                                                                                  | Illumina          | 312,669,723          | 0                  | 0                | 60,537               | 94.92        | 2                           |
| Phusion                   | Phusion2, SOAPdenovo, SSPACE                                                           | Illumina          | 1,522,735,963        | 4,494,848          | 77,302           | 365,061              | 99.71        | 53                          |
| Ray                       | Ray                                                                                    | Illumina          | 1,527,313,311        | 143,603            | 18,158           | 340,844              | 99.76        | 42                          |
| SGA                       | SGA                                                                                    | Illumina          | 1,442,930,293        | 4,536,273          | 28,397           | 357,395              | 99.71        | 51                          |
| SOAPdenovo                | SOAPdenovo                                                                             | Illumina          | 1,608,796,330        | 2,004,523          | 18,848           | 365,687              | 99.77        | 51                          |
| Symbiose                  | Monument, SSPACE, SuperScaffolder, GapCloser                                           | Illumina          | 1,989,598,057        | 1,794,214          | 82,841           | 339,360              | 99.58        | 45                          |

**Supplemental Table 7C. Statistics of the Assemblathon2 assembly (Fish)**

| Description of assemblers |                                                                                       |                   | Assembly statistics |                    |                  |
|---------------------------|---------------------------------------------------------------------------------------|-------------------|---------------------|--------------------|------------------|
| Team name                 | Principal software used                                                               | Type of data used | Total (≥500bp)      | Scaffold NG50 (bp) | Contig NG50 (bp) |
| <b>Platanus</b>           | <b>Platanus</b>                                                                       | <b>Illumina</b>   | <b>825,154,699</b>  | <b>2,371,946</b>   | <b>6,587</b>     |
| ABYSS                     | ABYSS                                                                                 | Illumina          | 849,812,973         | 1,013,854          | 4,030            |
| Allpaths                  | ALLPATHS-LG                                                                           | Illumina          | 845,883,785         | 3,677,909          | 14,105           |
| BCM-HGSC                  | SeqPrep, KmerFreq, Quake, BWA, Newbler, ALLPATHS-LG, Atlas-Link, Atlas-GapFill, Phrap | Illumina          | 868,269,785         | 4,850,564          | 17,895           |
| CSHL                      | Metassembler, ALLPATHS, SOAPdenovo                                                    | Illumina          | 845,089,232         | 3,418,986          | 16,740           |
| CSHL*                     | Metassembler, ALLPATHS, SOAPdenovo                                                    | Illumina          | 844,657,792         | 3,418,986          | 16,517           |
| CSHL**                    | Metassembler, ALLPATHS, SOAPdenovo                                                    | Illumina          | 545,734,294         | 1,560              | 1,550            |
| CTD                       | Unspecified                                                                           | Illumina          | 1,325,939,605       | 3,139              | 935              |
| CTD*                      | Unspecified                                                                           | Illumina          | 933,447,632         | 935                | 3,139            |
| CTD**                     | Unspecified                                                                           | Illumina          | 989,896,657         | 1,285              | 1,285            |
| IOBUGA                    | ALLPATHS-LG, SOAPdenovo                                                               | Illumina          | 825,949,698         | 261,156            | 1,472            |
| IOBUGA*                   | ALLPATHS-LG, SOAPdenovo                                                               | Illumina          | 2,193,012,109       | 51,717             | 556              |
| Meraculous                | meraculous                                                                            | Illumina          | 801,481,081         | 764,900            | 3,962            |
| Ray                       | Ray                                                                                   | Illumina          | 787,647,067         | 37,280             | 6,829            |
| SGA                       | SGA                                                                                   | Illumina          | 812,239,698         | 88,883             | 4,739            |
| SOAPdenovo                | SOAPdenovo                                                                            | Illumina          | 1,063,706,964       | 1,665,791          | 7,001            |
| Symbiose                  | Monument, SSPACE, SuperScaffolder, GapCloser                                          | Illumina          | 1,101,461,395       | 1,731,822          | 30,444           |

Team names, principal software used, and type of data used without Platanus are from the Assemblathon2 paper (Bradnam et al. 2013). \*and \*\* indicates the alternative assembling results submitted by same team.

For the bird and snake genomes, the procedures of fosmid validation are the same as those for *S. venezuelensis* (Table 4). For the fish genome, fosmid data are not available. The number of fosmids in the bird genome: 86. Total length of fosmids in the bird genome: 1,035,129 bp. The number of fosmids in the snake genome: 56. Total length of fosmids in the snake genome: 378,186 bp

## Scaffold NG10-90 length (bp)

**Supplemental Table 8. Scaffold NG10-90 length(bp)**

(A) *C.elegans* (0.0%)

|      | Platanus  | ALLPATHS-LG | MaSuRCA   | SOAPdenovo2 | Velvet    |
|------|-----------|-------------|-----------|-------------|-----------|
| NG10 | 1,299,912 | 1,381,440   | 1,034,395 | 1,289,828   | 1,430,751 |
| NG20 | 1,057,372 | 1,012,348   | 781,669   | 1,011,737   | 1,031,386 |
| NG30 | 804,064   | 802,422     | 674,619   | 808,239     | 718,216   |
| NG40 | 578,582   | 600,891     | 485,530   | 627,891     | 552,498   |
| NG50 | 478,744   | 466,658     | 420,694   | 511,116     | 436,119   |
| NG60 | 382,364   | 376,538     | 325,678   | 403,044     | 321,258   |
| NG70 | 304,681   | 290,317     | 234,815   | 308,761     | 212,774   |
| NG80 | 203,659   | 194,126     | 169,609   | 214,374     | 145,031   |
| NG90 | 112,112   | 118,336     | 80,754    | 135,279     | 77,580    |

(B) *C.elegans* (0.1%)

|      | Platanus  | ALLPATHS-LG | MaSuRCA   | SOAPdenovo2 | Velvet    |
|------|-----------|-------------|-----------|-------------|-----------|
| NG10 | 1,507,739 | 1,280,286   | 1,260,211 | 1,291,095   | 1,080,467 |
| NG20 | 1,118,163 | 870,208     | 1,073,314 | 1,012,332   | 874,181   |
| NG30 | 833,592   | 707,788     | 751,741   | 803,869     | 626,309   |
| NG40 | 638,510   | 541,384     | 591,818   | 622,297     | 479,630   |
| NG50 | 490,975   | 431,770     | 482,920   | 503,183     | 361,849   |
| NG60 | 410,194   | 349,491     | 347,389   | 404,715     | 250,384   |
| NG70 | 339,508   | 272,641     | 266,002   | 305,329     | 194,614   |
| NG80 | 226,408   | 184,507     | 194,975   | 211,058     | 138,162   |
| NG90 | 137,759   | 117,282     | 100,689   | 136,400     | 77,130    |

(C) *C.elegans* (0.2%)

|      | Platanus  | ALLPATHS-LG | MaSuRCA   | SOAPdenovo2 | Velvet    |
|------|-----------|-------------|-----------|-------------|-----------|
| NG10 | 1,618,829 | 1,114,597   | 1,194,022 | 1,500,581   | 1,134,779 |
| NG20 | 1,180,520 | 804,196     | 938,808   | 940,430     | 745,422   |
| NG30 | 888,969   | 634,922     | 761,774   | 805,146     | 596,877   |
| NG40 | 689,059   | 482,045     | 597,472   | 602,921     | 428,963   |
| NG50 | 535,328   | 375,904     | 430,011   | 489,092     | 340,229   |
| NG60 | 428,773   | 294,284     | 349,906   | 379,622     | 262,353   |
| NG70 | 341,982   | 209,437     | 277,283   | 293,423     | 197,949   |
| NG80 | 224,998   | 153,506     | 202,553   | 202,237     | 141,198   |
| NG90 | 136,349   | 96,208      | 110,772   | 123,884     | 84,078    |

(D) *C.elegans* (0.3%)

|      | <b>Platanus</b> | <b>ALLPATHS-LG</b> | <b>MaSuRCA</b> | <b>SOAPdenovo2</b> | <b>Velvet</b> |
|------|-----------------|--------------------|----------------|--------------------|---------------|
| NG10 | 1,706,653       | 626,135            | 1,160,198      | 1,261,449          | 789,635       |
| NG20 | 1,096,294       | 456,730            | 975,497        | 879,218            | 590,193       |
| NG30 | 852,632         | 360,603            | 773,873        | 741,682            | 459,920       |
| NG40 | 697,718         | 277,924            | 587,611        | 556,075            | 379,644       |
| NG50 | 579,390         | 219,404            | 460,620        | 441,950            | 299,631       |
| NG60 | 448,504         | 172,465            | 383,935        | 347,540            | 217,336       |
| NG70 | 359,483         | 133,539            | 309,512        | 266,033            | 147,297       |
| NG80 | 257,254         | 103,567            | 208,497        | 183,515            | 93,487        |
| NG90 | 148,904         | 75,929             | 120,869        | 116,841            | 47,291        |

(E) *C.elegans* (0.5%)

|      | <b>Platanus</b> | <b>ALLPATHS-LG</b> | <b>MaSuRCA</b> | <b>SOAPdenovo2</b> | <b>Velvet</b> |
|------|-----------------|--------------------|----------------|--------------------|---------------|
| NG10 | 1,238,095       | 236,448            | 1,272,404      | 950,483            | 939,107       |
| NG20 | 948,144         | 203,086            | 1,020,232      | 800,138            | 655,305       |
| NG30 | 729,332         | 175,721            | 779,038        | 568,611            | 463,144       |
| NG40 | 600,900         | 152,779            | 594,781        | 433,522            | 337,070       |
| NG50 | 497,387         | 127,365            | 475,513        | 363,065            | 259,666       |
| NG60 | 382,616         | 109,375            | 390,032        | 290,747            | 196,779       |
| NG70 | 319,057         | 94,762             | 310,998        | 222,863            | 142,912       |
| NG80 | 224,518         | 83,175             | 220,529        | 164,889            | 91,462        |
| NG90 | 134,593         | 72,075             | 133,248        | 94,426             | 49,101        |

(F) *C.elegans* (1.0%)

|      | <b>Platanus</b> | <b>ALLPATHS-LG</b> | <b>MaSuRCA</b> | <b>SOAPdenovo2</b> | <b>Velvet</b> |
|------|-----------------|--------------------|----------------|--------------------|---------------|
| NG10 | 1,297,465       | 179,692            | 1,498,834      | 735,944            | 810,795       |
| NG20 | 1,149,556       | 143,512            | 1,131,825      | 541,413            | 573,389       |
| NG30 | 833,362         | 123,052            | 747,427        | 444,954            | 453,838       |
| NG40 | 651,970         | 106,752            | 604,221        | 363,226            | 317,914       |
| NG50 | 511,190         | 91,413             | 466,806        | 283,097            | 243,330       |
| NG60 | 425,517         | 80,341             | 378,265        | 235,133            | 179,858       |
| NG70 | 344,783         | 72,753             | 302,525        | 186,200            | 136,810       |
| NG80 | 223,772         | 63,420             | 212,100        | 135,227            | 89,253        |
| NG90 | 139,858         | 54,176             | 125,733        | 78,550             | 51,144        |

(G) *C.elegans* (1.5%)

|      | <b>Platanus</b> | <b>ALLPATHS-LG</b> | <b>MaSuRCA</b> | <b>SOAPdenovo2</b> | <b>Velvet</b> |
|------|-----------------|--------------------|----------------|--------------------|---------------|
| NG10 | 1,827,873       | 158,231            | 1,214,376      | 736,944            | 668,279       |
| NG20 | 1,082,509       | 120,379            | 930,268        | 483,186            | 514,278       |
| NG30 | 829,962         | 99,275             | 728,678        | 390,611            | 354,197       |
| NG40 | 648,996         | 85,505             | 595,175        | 312,447            | 254,601       |
| NG50 | 516,958         | 73,543             | 472,079        | 252,105            | 188,027       |
| NG60 | 429,160         | 63,924             | 373,247        | 202,087            | 141,319       |
| NG70 | 343,322         | 55,792             | 294,906        | 153,400            | 95,869        |
| NG80 | 213,721         | 47,683             | 208,561        | 107,145            | 60,445        |
| NG90 | 134,986         | 41,908             | 135,272        | 63,670             | 28,289        |

(H) *C.elegans* (2.0%)

|      | <b>Platanus</b> | <b>ALLPATHS-LG</b> | <b>MaSuRCA</b> | <b>SOAPdenovo2</b> | <b>Velvet</b> |
|------|-----------------|--------------------|----------------|--------------------|---------------|
| NG10 | 1,284,850       | 182,554            | 967,957        | 648,847            | 604,533       |
| NG20 | 1,140,197       | 138,882            | 758,245        | 449,541            | 433,420       |
| NG30 | 804,731         | 117,845            | 603,073        | 331,717            | 326,488       |
| NG40 | 695,866         | 99,421             | 463,321        | 261,688            | 243,770       |
| NG50 | 580,832         | 86,979             | 351,406        | 212,590            | 179,009       |
| NG60 | 476,594         | 76,750             | 306,697        | 166,087            | 139,660       |
| NG70 | 351,908         | 67,216             | 230,394        | 132,960            | 94,833        |
| NG80 | 221,209         | 59,951             | 169,994        | 96,257             | 64,100        |
| NG90 | 139,114         | 52,800             | 109,939        | 54,218             | 30,207        |

(I) *S.venezuelensis*

|      | <b>Platanus</b> | <b>Allpaths-LG</b> | <b>MaSuRCA</b> | <b>SOAPdenovo2</b> | <b>Velvet</b> |
|------|-----------------|--------------------|----------------|--------------------|---------------|
| NG10 | 2,102,022       | 58,107             | 463,944        | 431,670            | 54,008        |
| NG20 | 925,806         | 42,052             | 343,565        | 249,005            | 36,783        |
| NG30 | 791,096         | 30,161             | 268,016        | 176,099            | 28,115        |
| NG40 | 375,176         | 22,351             | 219,753        | 137,042            | 21,369        |
| NG50 | 274,622         | 16,765             | 176,206        | 87,219             | 17,006        |
| NG60 | 196,403         | 12,696             | 133,437        | 60,314             | 13,331        |
| NG70 | 122,790         | 9,346              | 104,351        | 31,881             | 10,115        |
| NG80 | 65,702          | 6,467              | 66,847         | 9,104              | 7,073         |
| NG90 | 26,004          | 4,245              | 33,740         | 1,042              | 4,566         |

## (J) Oyster

|      | <b>Platanus</b> | <b>ALLPATHS-LG SOAPdenovo2</b> | <b>Reference</b> |
|------|-----------------|--------------------------------|------------------|
| NG10 | 1,006,309       | 601,021                        | 445,119          |
| NG20 | 703,142         | 368,683                        | 274,279          |
| NG30 | 560,689         | 268,463                        | 185,387          |
| NG40 | 463,742         | 199,001                        | 144,420          |
| NG50 | 381,943         | 154,144                        | 116,321          |
| NG60 | 304,883         | 120,995                        | 95,555           |
| NG70 | 241,514         | 93,217                         | 78,905           |
| NG80 | 174,316         | 67,456                         | 65,604           |
| NG90 | 114,291         | 43,004                         | 53,864           |

## (K) Bird

|      | <b>Platanus</b> | <b>ABL</b> | <b>Allpaths</b> | <b>BCM-HGSC</b> | <b>BCM-HGSC*</b> | <b>CBCB</b> |
|------|-----------------|------------|-----------------|-----------------|------------------|-------------|
| NG10 | 62,880,713      | 11,895     | 51,850,585      | 50,744,786      | 50,778,477       | 6,821,342   |
| NG20 | 46,789,031      | 7,252      | 43,673,219      | 36,361,565      | 36,382,184       | 4,485,048   |
| NG30 | 32,634,265      | 5,160      | 32,321,052      | 28,710,576      | 28,729,177       | 3,403,870   |
| NG40 | 26,995,412      | 3,903      | 24,784,735      | 21,262,213      | 21,272,772       | 2,526,179   |
| NG50 | 21,684,294      | 3,003      | 17,716,398      | 17,484,024      | 17,488,428       | 2,030,397   |
| NG60 | 17,827,529      | 2,293      | 10,697,592      | 13,216,098      | 13,231,830       | 1,578,131   |
| NG70 | 14,282,982      | 1,682      | 5,910,946       | 11,271,271      | 11,278,255       | 1,164,744   |
| NG80 | 9,727,504       | 1,114      | 2,593,459       | 7,546,938       | 7,554,023        | 754,764     |
| NG90 | 5,968,307       | 386        | 1,158,564       | 4,996,169       | 4,997,906        | 358,342     |

  

|      | <b>CoBig2</b> | <b>MLK Group</b> | <b>Meraculous</b> | <b>Newbler-454</b> | <b>Phusion</b> | <b>Ray</b> |
|------|---------------|------------------|-------------------|--------------------|----------------|------------|
| NG10 | 0             | 1,209,031        | 21,971,264        | 44,441,969         | 8,393,225      | 1,768,581  |
| NG20 | 0             | 699,238          | 19,817,668        | 38,027,496         | 5,554,260      | 1,324,848  |
| NG30 | 0             | 435,911          | 16,720,271        | 21,998,984         | 3,194,816      | 1,032,789  |
| NG40 | 0             | 257,153          | 12,212,215        | 15,965,151         | 2,075,433      | 823,189    |
| NG50 | 0             | 150,983          | 9,834,474         | 11,495,203         | 1,479,065      | 673,924    |
| NG60 | 0             | 90,999           | 6,380,895         | 7,590,506          | 995,317        | 547,665    |
| NG70 | 0             | 61,478           | 4,920,731         | 5,453,759          | 633,921        | 431,830    |
| NG80 | 0             | 46,449           | 3,252,565         | 2,975,273          | 377,375        | 309,595    |
| NG90 | 0             | 36,667           | 1,242,094         | 1,498,047          | 160,198        | 210,806    |

  

|      | <b>SGA</b> | <b>SOAPdenovo</b> | <b>SOAPdenovo*</b> | <b>SOAPdenovo**</b> |
|------|------------|-------------------|--------------------|---------------------|
| NG10 | 12,778,529 | 38,231,362        | 38,200,684         | 38,202,411          |
| NG20 | 9,415,776  | 32,052,133        | 31,998,732         | 32,003,806          |
| NG30 | 6,515,882  | 24,070,917        | 23,999,486         | 23,999,488          |
| NG40 | 4,771,230  | 20,086,533        | 20,006,866         | 20,016,674          |
| NG50 | 3,584,181  | 14,644,723        | 14,617,523         | 14,617,693          |
| NG60 | 1,729,186  | 11,905,535        | 11,852,284         | 11,851,058          |
| NG70 | 960,227    | 9,598,542         | 9,590,173          | 9,589,746           |
| NG80 | 375,337    | 7,180,134         | 6,941,360          | 6,942,997           |
| NG90 | 95,638     | 4,921,711         | 4,962,297          | 4,966,586           |

(L) Snake

|      | <b>Platanus</b> | <b>ABySS</b> | <b>BCM-HGSC</b> | <b>CRACS</b> | <b>Curtain</b> | <b>GAM</b> |
|------|-----------------|--------------|-----------------|--------------|----------------|------------|
| NG10 | 47,094,403      | 1,248,993    | 3,583,202       | 1,768,259    | 127,593        | 51,871     |
| NG20 | 29,240,389      | 949,273      | 2,713,362       | 1,349,350    | 98,649         | 37,782     |
| NG30 | 23,496,602      | 759,330      | 2,274,804       | 1,084,842    | 81,607         | 29,958     |
| NG40 | 20,967,559      | 614,516      | 1,867,836       | 903,848      | 68,639         | 24,064     |
| NG50 | 17,165,953      | 508,539      | 1,563,800       | 738,101      | 58,954         | 19,350     |
| NG60 | 12,697,854      | 408,619      | 1,267,990       | 587,518      | 49,980         | 15,294     |
| NG70 | 8,170,376       | 324,081      | 978,833         | 458,950      | 41,983         | 11,395     |
| NG80 | 5,314,452       | 241,034      | 717,580         | 336,507      | 33,797         | 7,585      |
| NG90 | 2,412,727       | 152,731      | 429,094         | 201,554      | 24,781         | 3,005      |

  

|      | <b>Meraculous</b> | <b>PRICE</b> | <b>Phusion</b> | <b>Ray</b> | <b>SGA</b> | <b>SOAPdenovo</b> |
|------|-------------------|--------------|----------------|------------|------------|-------------------|
| NG10 | 3,502,579         | 6,983        | 11,845,940     | 352,064    | 12,993,518 | 5,622,710         |
| NG20 | 2,576,484         | 2,859        | 9,156,505      | 269,788    | 9,425,130  | 3,931,095         |
| NG30 | 1,984,478         | 0            | 6,903,134      | 214,371    | 7,605,643  | 2,950,295         |
| NG40 | 1,549,323         | 0            | 5,405,344      | 176,354    | 5,740,483  | 2,475,891         |
| NG50 | 1,247,790         | 0            | 4,494,848      | 143,603    | 4,536,273  | 2,004,523         |
| NG60 | 972,173           | 0            | 3,555,306      | 116,626    | 3,540,879  | 1,652,388         |
| NG70 | 749,529           | 0            | 2,719,556      | 90,597     | 2,795,617  | 1,300,009         |
| NG80 | 518,879           | 0            | 1,954,421      | 68,068     | 1,837,486  | 1,009,391         |
| NG90 | 283,470           | 0            | 1,116,595      | 43,902     | 965,325    | 738,510           |

  

|      | <b>Symbiose</b> |
|------|-----------------|
| NG10 | 4,418,467       |
| NG20 | 3,256,016       |
| NG30 | 2,555,656       |
| NG40 | 2,169,012       |
| NG50 | 1,820,636       |
| NG60 | 1,511,774       |
| NG70 | 1,162,919       |
| NG80 | 832,722         |
| NG90 | 533,219         |

(M) Fish

|      | <b>Platanus</b>   | <b>ABySS</b> | <b>Allpaths</b> | <b>BCM-HGSC</b>   | <b>CSHL</b>     | <b>CSHL*</b>   |
|------|-------------------|--------------|-----------------|-------------------|-----------------|----------------|
| NG10 | 8,489,002         | 3,298,405    | 12,336,369      | 17,740,094        | 14,896,045      | 14,897,187     |
| NG20 | 6,392,478         | 2,539,529    | 8,670,083       | 10,852,127        | 8,654,806       | 8,655,503      |
| NG30 | 4,083,009         | 1,939,393    | 6,709,969       | 7,965,905         | 6,635,705       | 6,635,838      |
| NG40 | 3,123,730         | 1,365,921    | 4,702,643       | 6,282,426         | 4,471,403       | 4,471,803      |
| NG50 | 2,371,946         | 1,013,854    | 3,677,909       | 4,850,564         | 3,418,986       | 3,418,986      |
| NG60 | 1,770,377         | 668,305      | 2,691,423       | 3,466,513         | 2,548,971       | 2,549,735      |
| NG70 | 1,089,089         | 401,184      | 1,883,411       | 2,448,799         | 1,818,535       | 1,818,535      |
| NG80 | 430,819           | 89,403       | 1,017,865       | 1,296,719         | 1,016,930       | 1,024,270      |
| NG90 | 529               | 1,309        | 148,548         | 232,649           | 140,914         | 143,581        |
|      | <b>CSHL**</b>     | <b>CTD</b>   | <b>CTD*</b>     | <b>CTD**</b>      | <b>IOBUGA</b>   | <b>IOBUGA*</b> |
| NG10 | 5,536             | 1,833        | 6,501           | 2,670             | 830,833         | 96,292         |
| NG20 | 3,815             | 1,452        | 5,041           | 2,087             | 591,655         | 80,082         |
| NG30 | 2,803             | 1,225        | 4,205           | 1,741             | 443,165         | 66,866         |
| NG40 | 2,089             | 1,063        | 3,606           | 1,489             | 342,555         | 58,018         |
| NG50 | 1,560             | 935          | 3,139           | 1,285             | 261,156         | 51,802         |
| NG60 | 0                 | 828          | 2,758           | 1,114             | 193,297         | 47,703         |
| NG70 | 0                 | 736          | 2,424           | 964               | 127,067         | 43,018         |
| NG80 | 0                 | 654          | 2,126           | 829               | 57,655          | 40,571         |
| NG90 | 0                 | 580          | 1,856           | 706               | 1,199           | 40,148         |
|      | <b>Meraculous</b> | <b>Ray</b>   | <b>SGA</b>      | <b>SOAPdenovo</b> | <b>Symbiose</b> |                |
| NG10 | 3,016,460         | 146,640      | 432,108         | 4,529,614         | 5,522,939       |                |
| NG20 | 2,056,696         | 100,589      | 274,234         | 3,602,707         | 4,048,514       |                |
| NG30 | 1,522,853         | 72,924       | 190,973         | 2,705,482         | 3,058,302       |                |
| NG40 | 1,089,609         | 53,011       | 131,107         | 2,079,923         | 2,229,139       |                |
| NG50 | 764,900           | 37,280       | 88,883          | 1,665,791         | 1,731,822       |                |
| NG60 | 478,564           | 23,116       | 56,307          | 1,326,539         | 1,378,765       |                |
| NG70 | 247,526           | 9,975        | 36,875          | 1,010,856         | 973,031         |                |
| NG80 | 20,407            | 2,011        | 3,671           | 739,727           | 575,050         |                |
| NG90 | 188               | 0            | 0               | 461,692           | 129,181         |                |

NG(x) length indicates the length for which the collection of all sequences of that length or longer contains x% of the genome size



## NG10-NG90 number of Platanus' scaffold

**Supplemental Table 9. NG10-NG90 number of Platanus' scaffold**

|                                          | NG10 (#) | NG20 (#) | NG30 (#) | NG40 (#) | NG50 (#) | NG60 (#) | NG70 (#) | NG80 (#) | NG90 (#) |
|------------------------------------------|----------|----------|----------|----------|----------|----------|----------|----------|----------|
| <i>C. elegans</i> (heterozygosity: 0.0%) | 5        | 14       | 25       | 40       | 59       | 83       | 112      | 153      | 218      |
| <i>C. elegans</i> (heterozygosity: 0.1%) | 6        | 14       | 25       | 39       | 57       | 79       | 106      | 142      | 196      |
| <i>C. elegans</i> (heterozygosity: 0.2%) | 5        | 13       | 23       | 35       | 52       | 73       | 99       | 135      | 192      |
| <i>C. elegans</i> (heterozygosity: 0.3%) | 5        | 13       | 24       | 38       | 54       | 75       | 101      | 135      | 192      |
| <i>C. elegans</i> (heterozygosity: 0.5%) | 6        | 15       | 27       | 42       | 60       | 83       | 111      | 148      | 207      |
| <i>C. elegans</i> (heterozygosity: 1.0%) | 6        | 14       | 24       | 38       | 55       | 77       | 103      | 138      | 195      |
| <i>C. elegans</i> (heterozygosity: 1.5%) | 5        | 13       | 24       | 37       | 54       | 75       | 102      | 138      | 197      |
| <i>C. elegans</i> (heterozygosity: 2.0%) | 5        | 13       | 24       | 37       | 53       | 72       | 97       | 133      | 190      |
| <i>S. venezuelensis</i>                  | 3        | 7        | 14       | 26       | 44       | 69       | 107      | 173      | 315      |
| Oyster                                   | 45       | 113      | 204      | 316      | 450      | 616      | 823      | 1,097    | 1,500    |
| Bird                                     | 2        | 4        | 7        | 10       | 15       | 20       | 27       | 36       | 51       |
| Snake                                    | 3        | 7        | 13       | 19       | 27       | 37       | 51       | 73       | 113      |
| Fish                                     | 9        | 22       | 40       | 65       | 99       | 144      | 208      | 337      | 36,017   |

NG(x) number indicates the number of sequences of which length are larger than NG(x) length.

## Contig NG10-90 length (bp)

**Supplemental Table 10. Contig NG10-90 length(bp)**

(A) *C.elegans* (0.0%)

|      | <b>Platanus</b> | <b>ALLPATHS-LG</b> | <b>MaSuRCA</b> | <b>SOAPdenovo2</b> | <b>Velvet</b> |
|------|-----------------|--------------------|----------------|--------------------|---------------|
| NG10 | 192,938         | 232,734            | 226,404        | 493,427            | 64,326        |
| NG20 | 132,773         | 148,008            | 157,954        | 353,545            | 44,993        |
| NG30 | 105,754         | 113,873            | 121,324        | 273,396            | 33,345        |
| NG40 | 83,454          | 89,207             | 92,067         | 220,498            | 25,367        |
| NG50 | 66,446          | 67,596             | 74,686         | 171,976            | 19,084        |
| NG60 | 50,307          | 51,346             | 58,570         | 135,291            | 13,928        |
| NG70 | 37,192          | 37,916             | 43,099         | 109,298            | 9,609         |
| NG80 | 25,825          | 25,363             | 28,241         | 77,355             | 5,967         |
| NG90 | 13,107          | 11,950             | 14,042         | 44,139             | 2,462         |

(B) *C.elegans* (0.1%)

|      | <b>Platanus</b> | <b>ALLPATHS-LG</b> | <b>MaSuRCA</b> | <b>SOAPdenovo2</b> | <b>Velvet</b> |
|------|-----------------|--------------------|----------------|--------------------|---------------|
| NG10 | 198,400         | 241,348            | 228,369        | 481,772            | 45,061        |
| NG20 | 133,450         | 152,706            | 165,161        | 332,567            | 31,571        |
| NG30 | 105,276         | 117,106            | 125,254        | 269,881            | 22,984        |
| NG40 | 83,660          | 89,493             | 94,564         | 195,019            | 17,228        |
| NG50 | 65,717          | 66,289             | 77,050         | 155,501            | 13,031        |
| NG60 | 49,697          | 48,082             | 61,106         | 123,786            | 9,679         |
| NG70 | 37,148          | 34,836             | 44,061         | 99,441             | 6,774         |
| NG80 | 25,322          | 22,406             | 30,146         | 72,090             | 4,284         |
| NG90 | 13,699          | 8,954              | 16,078         | 41,678             | 1,870         |

(C) *C.elegans* (0.2%)

|      | <b>Platanus</b> | <b>ALLPATHS-LG</b> | <b>MaSuRCA</b> | <b>SOAPdenovo2</b> | <b>Velvet</b> |
|------|-----------------|--------------------|----------------|--------------------|---------------|
| NG10 | 182,449         | 154,212            | 235,712        | 456,205            | 24,347        |
| NG20 | 126,745         | 111,128            | 161,994        | 349,586            | 17,023        |
| NG30 | 98,839          | 81,180             | 124,031        | 237,129            | 13,235        |
| NG40 | 78,218          | 61,579             | 97,066         | 185,863            | 10,272        |
| NG50 | 61,969          | 45,370             | 76,439         | 144,468            | 8,138         |
| NG60 | 47,772          | 33,384             | 60,345         | 115,548            | 6,219         |
| NG70 | 35,843          | 21,974             | 44,884         | 90,855             | 4,541         |
| NG80 | 24,176          | 12,085             | 30,342         | 67,132             | 2,977         |
| NG90 | 12,884          | 3,169              | 16,678         | 38,499             | 1,403         |

(D) *C.elegans* (0.3%)

|      | <b>Platanus</b> | <b>ALLPATHS-LG</b> | <b>MaSuRCA</b> | <b>SOAPdenovo2</b> | <b>Velvet</b> |
|------|-----------------|--------------------|----------------|--------------------|---------------|
| NG10 | 164,485         | 76,478             | 242,359        | 415,911            | 38,745        |
| NG20 | 116,656         | 52,399             | 165,335        | 283,366            | 26,970        |
| NG30 | 93,880          | 37,795             | 127,075        | 219,515            | 19,690        |
| NG40 | 75,046          | 27,826             | 97,766         | 173,145            | 14,288        |
| NG50 | 59,795          | 19,629             | 79,194         | 141,590            | 10,182        |
| NG60 | 44,404          | 12,685             | 61,631         | 114,440            | 7,031         |
| NG70 | 33,057          | 6,249              | 45,941         | 89,237             | 4,541         |
| NG80 | 22,817          | 3,191              | 32,603         | 64,772             | 2,521         |
| NG90 | 12,144          | 2,265              | 17,687         | 36,775             | 844           |

(E) *C.elegans* (0.5%)

|      | <b>Platanus</b> | <b>ALLPATHS-LG</b> | <b>MaSuRCA</b> | <b>SOAPdenovo2</b> | <b>Velvet</b> |
|------|-----------------|--------------------|----------------|--------------------|---------------|
| NG10 | 164,394         | 15,825             | 253,792        | 334,037            | 31,569        |
| NG20 | 111,998         | 7,947              | 180,389        | 226,597            | 21,433        |
| NG30 | 87,618          | 3,712              | 132,925        | 178,201            | 15,507        |
| NG40 | 67,621          | 3,144              | 103,556        | 147,712            | 11,295        |
| NG50 | 53,873          | 2,807              | 80,813         | 117,418            | 8,149         |
| NG60 | 42,268          | 2,527              | 63,948         | 96,025             | 5,642         |
| NG70 | 30,808          | 2,250              | 47,699         | 74,562             | 3,632         |
| NG80 | 20,950          | 1,930              | 33,728         | 49,603             | 2,056         |
| NG90 | 10,716          | 1,379              | 18,236         | 28,462             | 676           |

(F) *C.elegans* (1.0%)

|      | <b>Platanus</b> | <b>ALLPATHS-LG</b> | <b>MaSuRCA</b> | <b>SOAPdenovo2</b> | <b>Velvet</b> |
|------|-----------------|--------------------|----------------|--------------------|---------------|
| NG10 | 143,669         | 2,518              | 238,294        | 310,724            | 14,339        |
| NG20 | 105,778         | 2,111              | 184,274        | 210,488            | 10,267        |
| NG30 | 77,587          | 1,830              | 135,419        | 159,713            | 7,712         |
| NG40 | 60,117          | 1,594              | 106,132        | 123,655            | 5,914         |
| NG50 | 48,090          | 1,358              | 84,827         | 103,677            | 4,449         |
| NG60 | 36,611          | 1,060              | 66,862         | 81,752             | 3,185         |
| NG70 | 26,364          | 0                  | 49,690         | 62,064             | 2,172         |
| NG80 | 18,213          | 0                  | 34,309         | 44,650             | 1,291         |
| NG90 | 9,081           | 0                  | 19,292         | 22,672             | 466           |

(G) *C.elegans* (1.5%)

|      | Platanus | ALLPATHS-LG | MaSuRCA | SOAPdenovo2 | Velvet |
|------|----------|-------------|---------|-------------|--------|
| NG10 | 126,966  | 2,414       | 212,609 | 239,276     | 2,954  |
| NG20 | 90,723   | 1,958       | 158,619 | 182,872     | 1,973  |
| NG30 | 69,584   | 1,650       | 124,361 | 143,873     | 1,433  |
| NG40 | 54,402   | 1,384       | 95,359  | 114,745     | 1,049  |
| NG50 | 42,013   | 1,103       | 75,918  | 90,768      | 766    |
| NG60 | 32,391   | 0           | 60,465  | 71,544      | 540    |
| NG70 | 24,134   | 0           | 46,913  | 53,645      | 344    |
| NG80 | 16,318   | 0           | 33,222  | 38,212      | 169    |
| NG90 | 7,793    | 0           | 18,797  | 20,637      | 54     |

(H) *C.elegans* (2.0%)

|      | Platanus | ALLPATHS-LG | MaSuRCA | SOAPdenovo2 | Velvet |
|------|----------|-------------|---------|-------------|--------|
| NG10 | 115,537  | 3,373       | 167,527 | 207,610     | 2,490  |
| NG20 | 83,739   | 2,725       | 124,880 | 139,001     | 1,669  |
| NG30 | 63,810   | 2,365       | 96,613  | 101,961     | 1,215  |
| NG40 | 50,834   | 2,070       | 78,570  | 78,465      | 901    |
| NG50 | 39,915   | 1,810       | 62,656  | 60,761      | 666    |
| NG60 | 29,911   | 1,542       | 50,683  | 46,279      | 475    |
| NG70 | 21,698   | 1,244       | 38,755  | 34,863      | 310    |
| NG80 | 14,438   | 594         | 27,688  | 24,035      | 163    |
| NG90 | 6,725    | 0           | 15,584  | 12,959      | 60     |

(I) *S.venezuelensis*

|      | Platanus | Allpaths-LG | MaSuRCA | SOAPdenovo2 | Velvet |
|------|----------|-------------|---------|-------------|--------|
| NG10 | 294,286  | 17,901      | 249,158 | 159,770     | 6,594  |
| NG20 | 180,007  | 10,929      | 186,992 | 118,350     | 4,519  |
| NG30 | 132,006  | 5,766       | 143,163 | 82,821      | 3,322  |
| NG40 | 101,406  | 2,824       | 110,833 | 63,257      | 2,530  |
| NG50 | 71,357   | 2,008       | 84,739  | 48,010      | 1,946  |
| NG60 | 48,673   | 1,632       | 61,140  | 31,658      | 1,497  |
| NG70 | 27,520   | 1,343       | 42,012  | 13,806      | 1,132  |
| NG80 | 10,176   | 1,030       | 21,664  | 4,721       | 825    |
| NG90 | 3,177    | 0           | 8,590   | 338         | 570    |

## (J) Oyster

|      | <b>Platanus</b> | <b>ALLPATHS-LG SOAPdenovo2</b> | <b>Reference</b> |
|------|-----------------|--------------------------------|------------------|
| NG10 | 25,770          | 34,313                         | 28,293           |
| NG20 | 18,536          | 24,195                         | 20,944           |
| NG30 | 14,326          | 18,763                         | 16,863           |
| NG40 | 11,341          | 15,068                         | 13,958           |
| NG50 | 9,011           | 12,025                         | 11,719           |
| NG60 | 7,051           | 9,519                          | 9,785            |
| NG70 | 5,363           | 7,221                          | 8,180            |
| NG80 | 3,849           | 5,046                          | 7,461            |
| NG90 | 2,453           | 2,785                          | 5,424            |
|      |                 |                                | 0                |

## (K) Bird

|      | <b>Platanus</b> | <b>ABL</b> | <b>Allpaths</b> | <b>BCM-HGSC</b> | <b>BCM-HGSC*</b> | <b>CBCB</b> |
|------|-----------------|------------|-----------------|-----------------|------------------|-------------|
| NG10 | 164,476         | 11,895     | 208,498         | 728,856         | 378,150          | 324,259     |
| NG20 | 116,174         | 7,252      | 141,346         | 482,370         | 259,905          | 232,760     |
| NG30 | 90,439          | 5,160      | 103,105         | 348,475         | 192,960          | 183,004     |
| NG40 | 71,602          | 3,903      | 76,412          | 256,506         | 149,767          | 146,787     |
| NG50 | 56,973          | 3,003      | 57,617          | 184,968         | 115,689          | 116,375     |
| NG60 | 44,679          | 2,293      | 42,074          | 133,777         | 86,391           | 90,165      |
| NG70 | 33,585          | 1,682      | 29,668          | 92,909          | 61,424           | 67,182      |
| NG80 | 23,385          | 1,114      | 19,832          | 55,761          | 40,829           | 47,373      |
| NG90 | 13,069          | 386        | 10,847          | 26,309          | 20,980           | 27,380      |

  

|      | <b>CoBig2</b> | <b>MLK Group</b> | <b>Meraculous</b> | <b>Newbler-454</b> | <b>Phusion</b> | <b>Ray</b> |
|------|---------------|------------------|-------------------|--------------------|----------------|------------|
| NG10 | 0             | 82,626           | 124,439           | 201,391            | 310,885        | 114,381    |
| NG20 | 0             | 61,784           | 84,465            | 144,150            | 198,285        | 84,074     |
| NG30 | 0             | 50,156           | 62,527            | 110,233            | 141,283        | 67,642     |
| NG40 | 0             | 42,339           | 48,067            | 85,730             | 101,039        | 54,888     |
| NG50 | 0             | 36,470           | 37,061            | 66,030             | 74,321         | 44,663     |
| NG60 | 0             | 31,498           | 28,037            | 49,785             | 51,814         | 35,808     |
| NG70 | 0             | 27,592           | 20,287            | 36,342             | 34,878         | 28,062     |
| NG80 | 0             | 24,240           | 13,122            | 23,139             | 20,881         | 20,963     |
| NG90 | 0             | 21,156           | 5,674             | 10,991             | 9,719          | 13,846     |

  

|      | <b>SGA</b> | <b>SOAPdenovo</b> | <b>SOAPdenovo*</b> | <b>SOAPdenovo**</b> |
|------|------------|-------------------|--------------------|---------------------|
| NG10 | 54,640     | 129,237           | 151,153            | 148,108             |
| NG20 | 38,313     | 89,472            | 108,749            | 106,806             |
| NG30 | 29,152     | 68,217            | 85,454             | 83,834              |
| NG40 | 22,770     | 52,723            | 68,607             | 67,108              |
| NG50 | 17,785     | 40,684            | 54,932             | 53,557              |
| NG60 | 13,382     | 30,264            | 43,288             | 42,163              |
| NG70 | 9,398      | 22,075            | 32,955             | 31,916              |
| NG80 | 5,665      | 14,691            | 23,558             | 22,632              |
| NG90 | 1,769      | 8,072             | 13,987             | 13,417              |

(L) Snake

|      | <b>Platanus</b> | <b>ABySS</b> | <b>BCM-HGSC</b> | <b>CRACS</b> | <b>Curtain</b> | <b>GAM</b> |
|------|-----------------|--------------|-----------------|--------------|----------------|------------|
| NG10 | 124,221         | 70,553       | 35,293          | 43,137       | 13,224         | 12,521     |
| NG20 | 93,609          | 53,301       | 25,883          | 32,275       | 9,430          | 9,154      |
| NG30 | 74,263          | 42,690       | 20,282          | 25,678       | 7,241          | 7,149      |
| NG40 | 60,205          | 34,985       | 16,096          | 20,834       | 5,694          | 5,683      |
| NG50 | 48,614          | 28,651       | 12,727          | 16,852       | 4,476          | 4,499      |
| NG60 | 38,536          | 23,262       | 9,776           | 13,385       | 3,435          | 3,477      |
| NG70 | 29,548          | 18,314       | 7,129           | 10,245       | 2,487          | 2,538      |
| NG80 | 20,730          | 13,587       | 4,479           | 7,221        | 1,582          | 1,609      |
| NG90 | 11,715          | 8,657        | 1,373           | 3,818        | 603            | 552        |

|      | <b>Meraculous</b> | <b>PRICE</b> | <b>Phusion</b> | <b>Ray</b> | <b>SGA</b> | <b>SOAPdenovo</b> |
|------|-------------------|--------------|----------------|------------|------------|-------------------|
| NG10 | 92,490            | 6,983        | 198,026        | 44,540     | 73,992     | 44,916            |
| NG20 | 68,539            | 2,859        | 147,670        | 33,899     | 54,907     | 34,102            |
| NG30 | 54,112            | 0            | 118,241        | 27,138     | 43,581     | 27,555            |
| NG40 | 43,035            | 0            | 95,908         | 22,241     | 35,273     | 22,716            |
| NG50 | 34,344            | 0            | 77,302         | 18,158     | 28,397     | 18,848            |
| NG60 | 27,073            | 0            | 61,719         | 14,597     | 22,468     | 15,525            |
| NG70 | 20,347            | 0            | 47,472         | 11,312     | 16,972     | 12,519            |
| NG80 | 13,883            | 0            | 33,533         | 8,120      | 11,663     | 9,687             |
| NG90 | 6,786             | 0            | 18,187         | 4,542      | 5,857      | 7,016             |

|      | <b>Symbiose</b> |
|------|-----------------|
| NG10 | 219,233         |
| NG20 | 164,409         |
| NG30 | 129,320         |
| NG40 | 102,520         |
| NG50 | 82,841          |
| NG60 | 65,963          |
| NG70 | 50,398          |
| NG80 | 35,826          |
| NG90 | 20,613          |

(M) Fish

|      | <b>Platanus</b> | <b>ABYSS</b> | <b>Allpaths</b> | <b>BCM-HGSC</b> | <b>CSHL</b> | <b>CSHL*</b> |
|------|-----------------|--------------|-----------------|-----------------|-------------|--------------|
| NG10 | 28,255          | 15,141       | 51,557          | 64,735          | 63,310      | 62,337       |
| NG20 | 19,083          | 10,516       | 35,844          | 45,188          | 43,750      | 43,295       |
| NG30 | 13,706          | 7,734        | 26,479          | 33,550          | 32,143      | 31,694       |
| NG40 | 9,780           | 5,688        | 19,630          | 25,064          | 23,616      | 23,354       |
| NG50 | 6,587           | 4,030        | 14,105          | 17,895          | 16,740      | 16,517       |
| NG60 | 3,771           | 2,550        | 9,378           | 11,918          | 10,972      | 10,858       |
| NG70 | 1,110           | 1,074        | 4,955           | 6,482           | 5,822       | 5,770        |
| NG80 | 0               | 0            | 0               | 927             | 0           | 0            |
| NG90 | 0               | 0            | 0               | 0               | 0           | 0            |

  

|      | <b>CSHL**</b> | <b>CTD</b> | <b>CTD*</b> | <b>CTD**</b> | <b>IOBUGA</b> | <b>IOBUGA*</b> |
|------|---------------|------------|-------------|--------------|---------------|----------------|
| NG10 | 5,529         | 1,833      | 6,501       | 2,670        | 6,073         | 2,015          |
| NG20 | 3,807         | 1,452      | 5,041       | 2,087        | 4,149         | 1,397          |
| NG30 | 2,796         | 1,225      | 4,205       | 1,741        | 2,978         | 1,033          |
| NG40 | 2,081         | 1,063      | 3,606       | 1,489        | 2,144         | 764            |
| NG50 | 1,550         | 935        | 3,139       | 1,285        | 1,472         | 556            |
| NG60 | 0             | 828        | 2,758       | 1,114        | 0             | 388            |
| NG70 | 0             | 736        | 2,424       | 964          | 0             | 242            |
| NG80 | 0             | 654        | 2,126       | 829          | 0             | 127            |
| NG90 | 0             | 580        | 1,856       | 706          | 0             | 0              |

  

|      | <b>Meraculous</b> | <b>Ray</b> | <b>SGA</b> | <b>SOAPdenovo</b> | <b>Symbiose</b> |
|------|-------------------|------------|------------|-------------------|-----------------|
| NG10 | 17,596            | 22,802     | 20,520     | 22,950            | 117,549         |
| NG20 | 11,878            | 16,008     | 13,929     | 16,346            | 81,516          |
| NG30 | 8,429             | 12,075     | 9,977      | 12,309            | 60,014          |
| NG40 | 5,984             | 9,193      | 7,088      | 9,378             | 43,292          |
| NG50 | 3,962             | 6,829      | 4,739      | 7,001             | 30,444          |
| NG60 | 2,115             | 4,774      | 2,690      | 4,932             | 19,197          |
| NG70 | 526               | 2,670      | 980        | 3,050             | 9,196           |
| NG80 | 0                 | 451        | 0          | 1,173             | 2,444           |
| NG90 | 0                 | 0          | 0          | 0                 | 981             |

NG(x) length indicates the length for which the collection of all sequences of that length or longer contains x% of the genome size

### Statistics of assemblies of purely simulated data (*C. elegans*)

The pure simulation tests have been performed. Using the simulator of Illumina data (pIRS, Hu et al. 2012), we generated the data from *C. elegans* genome with the same coverage depth and insert sizes as the data in the manuscript (Supplemental Table 1). Heterozygosities were simulated in two ways, 0% and 1%. The results are displayed in Supplemental Table 11.

**Supplemental Table 11. Statistics of assemblies of purely simulated data  
(*C. elegans*)**

(A) Heterozygosity: 0%

|                                      | <b>Platanus</b> | <b>ALLPATHS-LG</b> | <b>MaSuRCA</b> | <b>SOAPdenovo2</b> | <b>Velvet</b> |
|--------------------------------------|-----------------|--------------------|----------------|--------------------|---------------|
| Total ( $\geq 500$ bp)               | 99,095,271      | 99,244,554         | 99,368,655     | 99,316,698         | 100,242,764   |
| Number of scaffolds ( $\geq 500$ bp) | 623             | 446                | 1,930          | 486                | 696           |
| Scaffold NG50 (bp)                   | 1,662,234       | 954,649            | 494,503        | 1,233,697          | 1,827,862     |
| Corrected scaffold NG50 (bp)         | 673,078         | 741,372            | 164,950        | 774,682            | 834,325       |
| Contig NG50 (bp)                     | 267,789         | 77,347             | 122,258        | 298,574            | 50,874        |
| Corrected contig NG50 (bp)           | 134,027         | 67,354             | 65,769         | 84,248             | 47,498        |
| Number of errors                     | 241             | 145                | 858            | 481                | 296           |

(B) Heterozygosity: 1%

|                                      | <b>Platanus</b> | <b>ALLPATHS-LG</b> | <b>MaSuRCA</b> | <b>SOAPdenovo2</b> | <b>Velvet</b> |
|--------------------------------------|-----------------|--------------------|----------------|--------------------|---------------|
| Total ( $\geq 500$ bp)               | 100,720,046     | 63,315,575         | 105,861,126    | 99,542,464         | 105,804,436   |
| Number of scaffolds ( $\geq 500$ bp) | 666             | 5,075              | 7,082          | 1,341              | 1,917         |
| Scaffold NG50 (bp)                   | 6,157,496       | 10,165             | 1,746,798      | 417,346            | 306,871       |
| Corrected scaffold NG50 (bp)         | 1,229,293       | 1,234              | 600,124        | 319,602            | 35,926        |
| Contig NG50 (bp)                     | 143,138         | 1,006              | 266,923        | 136,170            | 6,404         |
| Corrected contig NG50 (bp)           | 72,476          | 925                | 75,980         | 10,825             | 5,879         |
| Number of errors                     | 187             | 359                | 483            | 1,160              | 5,814         |

The trend is similar to HiSeq2000-based simulation, that is, only Platanus and MaSuRCA do not decrease (corrected) NG50 according to the increase of heterozygosity, and the numbers of errors of Platanus is less than those of MaSuRCA. However, all cases but one (ALLPATHS-LG in heterozygosity 1%) indicate larger scaffold NG50 compared to the real-data tests (HiSeq2000-simulation-free *C. elegans* data and *S. venezuelensis* data, see Supplemental Table 2 and Table 4). The differences are significant especially for Platanus and MaSuRCA, though two paired-ends and one



mate-pair libraries were prepared for all tests of nematodes.

Additionally, to investigate whether ALLPATHS-LG successfully accepted 230bp-paired-end of HiSeq2000-*C.elegans* data (Supplemental Table 1), we generated another data sets (insert-sizes of 180 bp, 430 bp and 4.7 kbp), and compared with abovementioned data sets (insert-sizes of 230bp, 430bp and 4.7kbp). Both data had the same total size as HiSeq2000 data, and heterozygosities were set as 0% and 1%. The assembly result is shown in the Supplemental Table 12.

**Supplemental Table 12. Test of ALLPATHS-LG with overlapping paired-ends  
(simulation data, *C.elegans*)**

|                                      | Heterozygosity: 0%   |                      | Heterozygosity: 1%   |                      |
|--------------------------------------|----------------------|----------------------|----------------------|----------------------|
|                                      | Shortest-insert: 180 | Shortest-insert: 230 | Shortest-insert: 180 | Shortest-insert: 230 |
| Total ( $\geq 500$ bp)               | 99,359,985           | 99,244,554           | 60,777,760           | 63,315,575           |
| Number of scaffolds ( $\geq 500$ bp) | 419                  | 446                  | 7,584                | 5,075                |
| Scaffold NG50 (bp)                   | 1,020,326            | 954,649              | 5,586                | 10,165               |
| Corrected scaffold NG50 (bp)         | 851,821              | 741,372              | 1,183                | 1,234                |
| Contig NG50 (bp)                     | 101,353              | 77,347               | 880                  | 1,006                |
| Corrected contig NG50 (bp)           | 79,230               | 67,354               | 851                  | 925                  |
| Number of errors                     | 161                  | 145                  | 343                  | 359                  |

Replacing 230bp-paired-end with 180bp-paired-end, corrected scaffold NG50 increased by 13% when heterozygosity was 0%. Unexpectedly, that replacement decreased corrected scaffold NG50 when heterozygosity was 1%. These results infer that ALLPATHS-LG does not miss the performance significantly and can accept 230bp-paired-end as overlapping paired-end.

### Turning-off tests for Platanus' features

We executed benchmark test turning off Platanus' features (1)  $k$ -mer extension, (2) bubble-removal in contig-assembly, (3) removal of hetero-regions in scaffolding. Note that "hetero removal of hetero-regions in scaffolding" includes both bubble-removal and branch-cut. Inputs were *C. elegans* (heterozygosity: 0%, 1%, 2%) and *S. venezuelensis* data described in the manuscript. The results are shown in Supplemental Table 13.

**Supplemental Table 13. Results of turning-off tests for Platanus' features**

(A) *C.elegans* (heterozygosity: 0%)

|                                      | Default    | – ( $k$ -mer-extension) | – (bubble-removal<br>in contig-assembly) | – (hetero-removal in<br>scaffolding) |
|--------------------------------------|------------|-------------------------|------------------------------------------|--------------------------------------|
| Total ( $\geq 500$ bp)               | 97,938,690 | 96,528,882              | 98,022,430                               | 98,715,700                           |
| Number of scaffolds ( $\geq 500$ bp) | 942        | 1,953                   | 852                                      | 1,214                                |
| Scaffold NG50 (bp)                   | 478,744    | 306,733                 | 481,025                                  | 415,878                              |
| Corrected scaffold NG50 (bp)         | 361,608    | 226,959                 | 375,389                                  | 334,052                              |
| Contig NG50 (bp)                     | 66,446     | 35,712                  | 67,574                                   | 66,447                               |
| Corrected contig NG50 (bp)           | 48,054     | 30,899                  | 49,046                                   | 48,800                               |
| Number of errors                     | 367        | 257                     | 342                                      | 274                                  |

(B) *C.elegans* (heterozygosity: 1%)

|                                      | Default    | – ( $k$ -mer-extension) | – (bubble-removal<br>in contig-assembly) | – (hetero-removal in<br>scaffolding) |
|--------------------------------------|------------|-------------------------|------------------------------------------|--------------------------------------|
| Total ( $\geq 500$ bp)               | 99,223,085 | 96,211,233              | 140,267,578                              | 100,641,997                          |
| Number of scaffolds ( $\geq 500$ bp) | 1,289      | 2,193                   | 24,301                                   | 4,579                                |
| Scaffold NG50 (bp)                   | 511,190    | 291,355                 | 45,673                                   | 381,587                              |
| Corrected scaffold NG50 (bp)         | 368,857    | 204,518                 | 20,728                                   | 195,751                              |
| Contig NG50 (bp)                     | 48,090     | 8,887                   | 6,268                                    | 14,472                               |
| Corrected contig NG50 (bp)           | 39,291     | 8,547                   | 5,970                                    | 13,665                               |
| Number of errors                     | 290        | 160                     | 203                                      | 228                                  |

(C) *C.elegans* (heterozygosity: 2%)

|                                      | Default     | – ( $k$ -mer-extension) | – (bubble-removal<br>in contig-assembly) | – (hetero-removal in<br>scaffolding) |
|--------------------------------------|-------------|-------------------------|------------------------------------------|--------------------------------------|
| Total ( $\geq 500$ bp)               | 100,454,422 | 96,157,873              | 183,642,064                              | 108,879,145                          |
| Number of scaffolds ( $\geq 500$ bp) | 2,264       | 2,434                   | 10,902                                   | 17,986                               |
| Scaffold NG50 (bp)                   | 580,832     | 270,290                 | 81,927                                   | 207,088                              |
| Corrected scaffold NG50 (bp)         | 341,914     | 204,425                 | 26,451                                   | 100,787                              |
| Contig NG50 (bp)                     | 39,915      | 6,704                   | 22,094                                   | 7,545                                |
| Corrected contig NG50 (bp)           | 34,030      | 6,517                   | 16,994                                   | 7,316                                |
| Number of errors                     | 256         | 129                     | 146                                      | 170                                  |

(D) *S. venezuelensis*

|                                      | Default    | – ( <i>k</i> -mer-extension) | – (bubble-removal<br>in contig-assembly) | – (hetero-removal in<br>scaffolding) |
|--------------------------------------|------------|------------------------------|------------------------------------------|--------------------------------------|
| Total ( $\geq 500$ bp)               | 58,503,689 | 45,493,271                   | 74,553,871                               | 60,793,871                           |
| Number of scaffolds ( $\geq 500$ bp) | 2,560      | 1,660                        | 9,304                                    | 7,026                                |
| Scaffold NG50 (bp)                   | 274,622    | 127,238                      | 52,920                                   | 108,844                              |
| Contig NG50 (bp)                     | 71,357     | 15,708                       | 7,754                                    | 15,983                               |

When *k*-mer extension was turned off, scaffold (corrected) NG50 decreased in all cases, inferring that *k*-mer extension is fundamentally important function. As expected, deactivations of bubble-removal in contig-assembly and hetero-removal in scaffolding reduced scaffold (corrected) NG50 for heterozygous input data. Therefore, it is indicated that these features are effective for heterozygous samples.

### Downsampling benchmark test (*C. elegans*)

We performed the benchmark test using reduced amount of sequence data for *C.elegans* (heterozygosity: 0%, 1%, 2%) to measure the impact for the assembling result of sequence amounts (Downsampling benchmark test). Downsampled datum sizes are 3/4, 1/2, 1/4, 1/8, and 1/16. Results are displayed in the Supplemental Figure 28 and the Supplemental Table 14.

(A) *C. elegans* (heterozygosity: 0%)

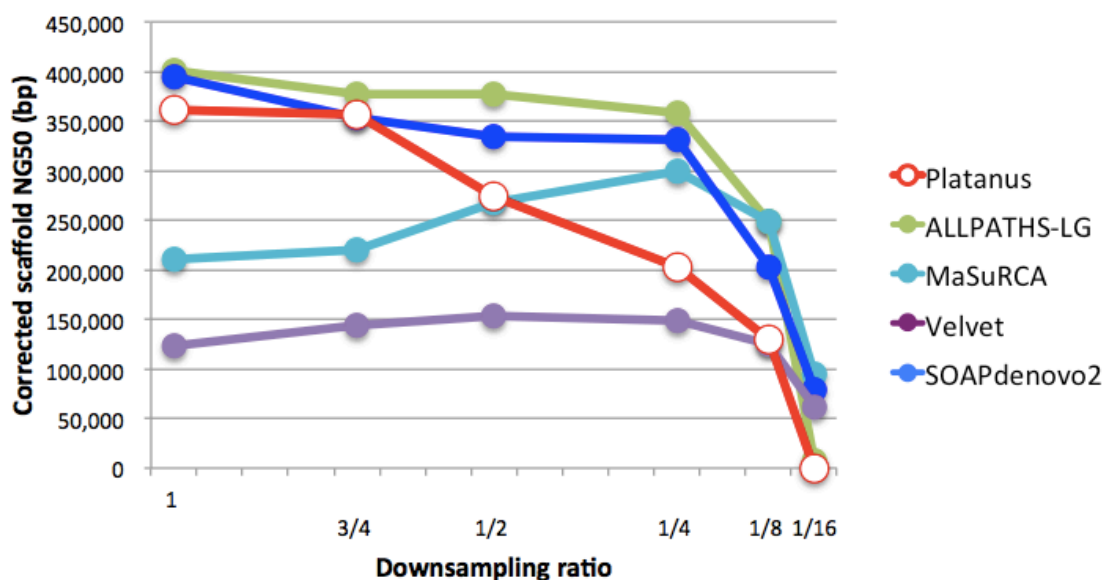

(B) *C. elegans* (heterozygosity: 1%)

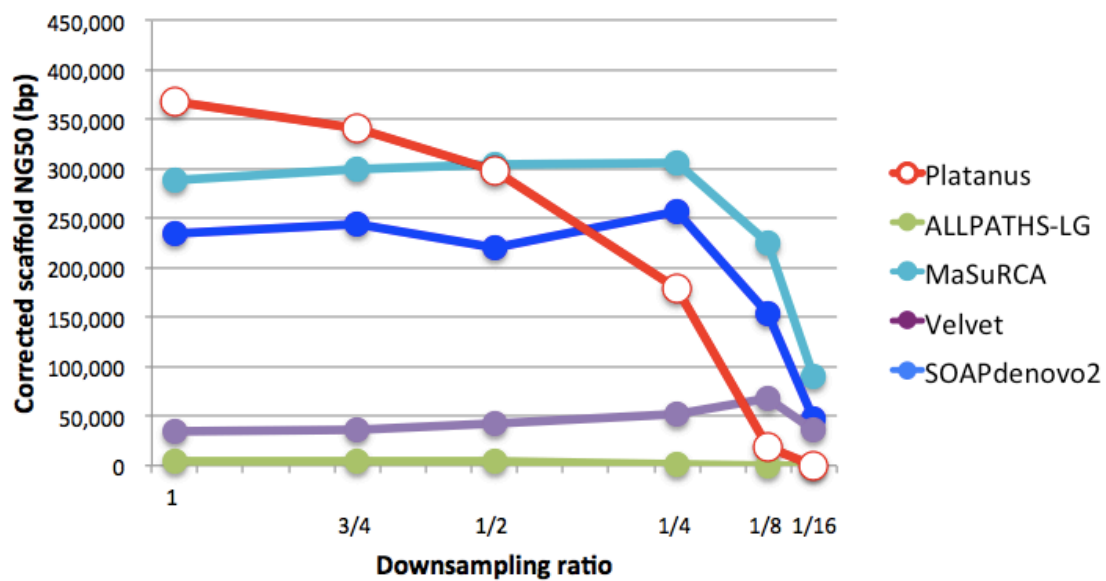

(C) *C. elegans* (heterozygosity: 2%)

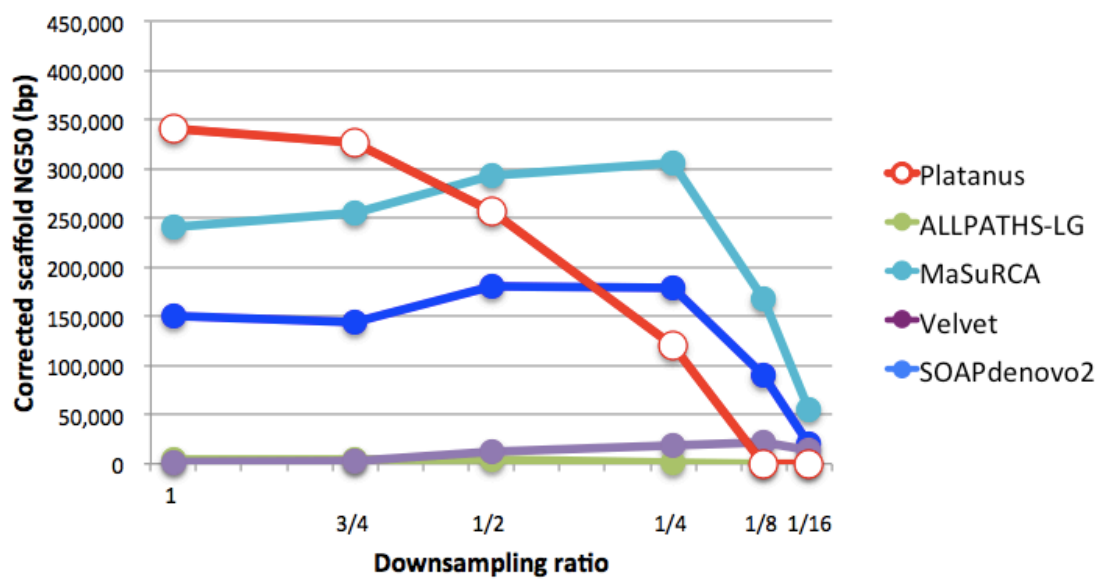

Supplemental Figure 28. Corrected scaffold NG50 in downsampling tests

**Supplemental Table 14. Detail statistics of downsampling benchmark tests**

(A) *C. elegans* (heterozygosity: 0%)

|                                      | Platanus   | ALLPATHS-LG | MaSuRCA    | SOAPdenovo2 | Velvet     |
|--------------------------------------|------------|-------------|------------|-------------|------------|
| <b>Downsampling ratio: 1/1</b>       |            |             |            |             |            |
| Total ( $\geq 500$ bp)               | 97,938,690 | 98,864,571  | 97,742,565 | 99,132,377  | 99,382,943 |
| Number of scaffolds ( $\geq 500$ bp) | 942        | 619         | 1,369      | 794         | 1,375      |
| Scaffold NG50 (bp)                   | 478,744    | 466,658     | 420,694    | 507,513     | 436,119    |
| Corrected scaffold NG50 (bp)         | 361,608    | 402,062     | 210,683    | 394,556     | 123,438    |
| Contig NG50 (bp)                     | 66,446     | 67,596      | 74,686     | 170,395     | 19,084     |
| Corrected contig NG50 (bp)           | 48,054     | 46,361      | 40,248     | 45,927      | 19,938     |
| Number of errors                     | 367        | 272         | 900        | 407         | 1,490      |
| <b>Downsampling ratio: 3/4</b>       |            |             |            |             |            |
| Total ( $\geq 500$ bp)               | 97,880,813 | 98,763,216  | 98,479,896 | 99,071,997  | 99,497,441 |
| Number of scaffolds ( $\geq 500$ bp) | 1,012      | 602         | 1,264      | 865         | 1,329      |
| Scaffold NG50 (bp)                   | 455,094    | 480,286     | 506,779    | 476,394     | 430,832    |
| Corrected scaffold NG50 (bp)         | 356,829    | 378,418     | 221,125    | 353,562     | 144,941    |
| Contig NG50 (bp)                     | 65,256     | 68,458      | 66,167     | 155,175     | 21,808     |
| Corrected contig NG50 (bp)           | 47,219     | 45,967      | 39,721     | 43,981      | 20,267     |
| Number of errors                     | 375        | 325         | 854        | 536         | 1,189      |
| <b>Downsampling ratio: 1/2</b>       |            |             |            |             |            |
| Total ( $\geq 500$ bp)               | 98,130,065 | 98,726,036  | 99,257,018 | 98,983,521  | 99,261,376 |
| Number of scaffolds ( $\geq 500$ bp) | 1,143      | 642         | 1,114      | 974         | 1,401      |
| Scaffold NG50 (bp)                   | 417,069    | 428,223     | 461,620    | 421,981     | 387,445    |
| Corrected scaffold NG50 (bp)         | 273,728    | 377,702     | 268,513    | 334,428     | 154,132    |
| Contig NG50 (bp)                     | 56,056     | 65,793      | 58,087     | 153,213     | 20,702     |
| Corrected contig NG50 (bp)           | 40,595     | 42,947      | 38,256     | 43,263      | 19,351     |
| Number of errors                     | 400        | 304         | 855        | 515         | 1,113      |
| <b>Downsampling ratio: 1/4</b>       |            |             |            |             |            |
| Total ( $\geq 500$ bp)               | 96,416,108 | 98,696,419  | 98,945,932 | 99,012,707  | 98,893,576 |
| Number of scaffolds ( $\geq 500$ bp) | 2,577      | 736         | 1,016      | 971         | 1,774      |
| Scaffold NG50 (bp)                   | 257,681    | 428,259     | 480,121    | 421,984     | 343,426    |
| Corrected scaffold NG50 (bp)         | 203,642    | 358,152     | 300,653    | 332,270     | 148,787    |
| Contig NG50 (bp)                     | 27,924     | 52,614      | 42,143     | 131,448     | 14,409     |
| Corrected contig NG50 (bp)           | 24,731     | 35,783      | 30,748     | 40,472      | 13,745     |
| Number of errors                     | 244        | 285         | 861        | 555         | 989        |

|                                      | Platanus   | ALLPATHS-LG | MaSuRCA     | SOAPdenovo2 | Velvet      |
|--------------------------------------|------------|-------------|-------------|-------------|-------------|
| <b>Downsampling ratio: 1/8</b>       |            |             |             |             |             |
| Total ( $\geq 500$ bp)               | 93,770,232 | 98,474,312  | 99,623,297  | 98,677,012  | 99,049,859  |
| Number of scaffolds ( $\geq 500$ bp) | 6,758      | 1,397       | 1,335       | 1,954       | 2,445       |
| Scaffold NG50 (bp)                   | 170,745    | 304,508     | 437,750     | 254,468     | 264,900     |
| Corrected scaffold NG50 (bp)         | 129,402    | 248,726     | 248,776     | 203,303     | 125,794     |
| Contig NG50 (bp)                     | 15,087     | 27,920      | 24,069      | 64,621      | 11,379      |
| Corrected contig NG50 (bp)           | 13,596     | 20,237      | 19,554      | 28,438      | 10,701      |
| Number of errors                     | 230        | 464         | 1,038       | 757         | 1,410       |
| <b>Downsampling ratio: 1/16</b>      |            |             |             |             |             |
| Total ( $\geq 500$ bp)               | 10,838     | 75,698,629  | 101,746,165 | 98,510,063  | 100,385,334 |
| Number of scaffolds ( $\geq 500$ bp) | 6          | 7,440       | 4,962       | 6,963       | 6,887       |
| Scaffold NG50 (bp)                   | 0          | 21,120      | 173,469     | 121,000     | 135,774     |
| Corrected scaffold NG50 (bp)         | 0          | 6,899       | 94,498      | 79,674      | 62,353      |
| Contig NG50 (bp)                     | 0          | 1,016       | 3,489       | 10,522      | 3,673       |
| Corrected contig NG50 (bp)           | 0          | 480         | 3,255       | 5,226       | 3,461       |
| Number of errors                     | 8          | 812         | 1,795       | 1,358       | 1,629       |

(B) *C. elegans* (heterozygosity: 1%)

|                                      | Platanus   | ALLPATHS-LG | MaSuRCA     | SOAPdenovo2 | Velvet      |
|--------------------------------------|------------|-------------|-------------|-------------|-------------|
| <b>Downsampling ratio: 1/1</b>       |            |             |             |             |             |
| Total ( $\geq 500$ bp)               | 99,223,085 | 163,953,538 | 100,913,677 | 99,086,653  | 103,773,061 |
| Number of scaffolds ( $\geq 500$ bp) | 1,289      | 5,061       | 2,803       | 1,575       | 2,642       |
| Scaffold NG50 (bp)                   | 511,190    | 91,413      | 466,806     | 280,050     | 243,330     |
| Corrected scaffold NG50 (bp)         | 368,857    | 4,928       | 288,752     | 234,395     | 34,491      |
| Contig NG50 (bp)                     | 48,090     | 1,358       | 84,827      | 103,677     | 4,445       |
| Corrected contig NG50 (bp)           | 39,291     | 1,316       | 44,746      | 16,784      | 4,360       |
| Number of errors                     | 290        | 542         | 895         | 1,226       | 6,285       |
| <b>Downsampling ratio: 3/4</b>       |            |             |             |             |             |
| Total ( $\geq 500$ bp)               | 99,163,809 | 150,279,673 | 100,225,734 | 98,818,960  | 103,129,963 |
| Number of scaffolds ( $\geq 500$ bp) | 1,341      | 5,758       | 2,509       | 1,410       | 2,569       |
| Scaffold NG50 (bp)                   | 504,880    | 69,518      | 499,699     | 298,021     | 217,593     |
| Corrected scaffold NG50 (bp)         | 340,818    | 4,860       | 299,378     | 244,472     | 36,432      |
| Contig NG50 (bp)                     | 42,275     | 1,107       | 71,502      | 106,094     | 4,329       |
| Corrected contig NG50 (bp)           | 35,778     | 1,077       | 43,120      | 18,000      | 4,135       |
| Number of errors                     | 315        | 657         | 829         | 1,189       | 5,531       |

|                                      | Platanus   | ALLPATHS-LG | MaSuRCA     | SOAPdenovo2 | Velvet      |
|--------------------------------------|------------|-------------|-------------|-------------|-------------|
| <b>Downsampling ratio: 1/2</b>       |            |             |             |             |             |
| Total ( $\geq 500$ bp)               | 98,595,467 | 126,737,588 | 100,137,899 | 100,939,856 | 102,641,002 |
| Number of scaffolds ( $\geq 500$ bp) | 1,330      | 6,657       | 2,001       | 2,474       | 2,544       |
| Scaffold NG50 (bp)                   | 479,535    | 42,406      | 532,649     | 310,326     | 221,497     |
| Corrected scaffold NG50 (bp)         | 297,513    | 4,837       | 305,051     | 221,003     | 42,094      |
| Contig NG50 (bp)                     | 28,493     | 0           | 61,245      | 98,439      | 4,209       |
| Corrected contig NG50 (bp)           | 25,136     | 0           | 38,721      | 5,178       | 4,044       |
| Number of errors                     | 353        | 519         | 887         | 859         | 4,875       |
| <b>Downsampling ratio: 1/4</b>       |            |             |             |             |             |
| Total ( $\geq 500$ bp)               | 95,754,933 | 69,626,022  | 99,518,376  | 98,797,170  | 101,657,122 |
| Number of scaffolds ( $\geq 500$ bp) | 3,567      | 7,934       | 1,172       | 1,460       | 2,777       |
| Scaffold NG50 (bp)                   | 224,151    | 9,946       | 482,535     | 339,915     | 198,489     |
| Corrected scaffold NG50 (bp)         | 179,349    | 1,158       | 306,847     | 257,520     | 52,811      |
| Contig NG50 (bp)                     | 7,358      | 0           | 40,093      | 83,253      | 3,973       |
| Corrected contig NG50 (bp)           | 7,080      | 0           | 29,217      | 17,432      | 3,821       |
| Number of errors                     | 143        | 399         | 922         | 1,011       | 3,804       |
| <b>Downsampling ratio: 1/8</b>       |            |             |             |             |             |
| Total ( $\geq 500$ bp)               | 83,767,296 | 57,815,377  | 99,374,458  | 97,971,268  | 101,381,085 |
| Number of scaffolds ( $\geq 500$ bp) | 16,206     | 9,328       | 1,357       | 2,710       | 3,650       |
| Scaffold NG50 (bp)                   | 34,922     | 4,468       | 418,564     | 196,971     | 200,010     |
| Corrected scaffold NG50 (bp)         | 18,716     | 0           | 225,193     | 153,697     | 67,885      |
| Contig NG50 (bp)                     | 1,069      | 0           | 15,973      | 42,112      | 4,126       |
| Corrected contig NG50 (bp)           | 1,047      | 0           | 13,417      | 15,796      | 3,971       |
| Number of errors                     | 214        | 473         | 1,254       | 1,080       | 2,401       |
| <b>Downsampling ratio: 1/16</b>      |            |             |             |             |             |
| Total ( $\geq 500$ bp)               | 7,978      | 13,377,870  | 101,657,657 | 98,102,179  | 102,069,954 |
| Number of scaffolds ( $\geq 500$ bp) | 2          | 5,795       | 6,085       | 9,417       | 9,303       |
| Scaffold NG50 (bp)                   | 0          | 0           | 200,674     | 81,641      | 109,050     |
| Corrected scaffold NG50 (bp)         | 0          | 0           | 90,557      | 47,639      | 35,800      |
| Contig NG50 (bp)                     | 0          | 0           | 2,327       | 6,257       | 2,307       |
| Corrected contig NG50 (bp)           | 0          | 0           | 2,197       | 3,344       | 2,216       |
| Number of errors                     | 11         | 249         | 1,854       | 1,327       | 2,135       |



(C) *C. elegans* (heterozygosity: 2%)

|                                | Platanus    | ALLPATHS-LG | MaSuRCA     | SOAPdenovo2 | Velvet      |
|--------------------------------|-------------|-------------|-------------|-------------|-------------|
| <b>Downsampling ratio: 1/1</b> |             |             |             |             |             |
| Total (≥500 bp)                | 100,454,422 | 170,519,463 | 105,340,084 | 99,546,387  | 110,798,448 |
| Number of scaffolds (≥500 bp)  | 2,264       | 6,467       | 4,763       | 1,727       | 10,692      |
| Scaffold NG50 (bp)             | 580,832     | 86,979      | 351,406     | 212,590     | 179,009     |
| Corrected scaffold NG50 (bp)   | 341,914     | 5,178       | 240,778     | 150,059     | 1,932       |
| Contig NG50 (bp)               | 39,915      | 1,810       | 62,656      | 60,761      | 666         |
| Corrected contig NG50 (bp)     | 34,030      | 1,648       | 38,465      | 4,013       | 1,721       |
| Number of errors               | 256         | 496         | 774         | 1,839       | 36,840      |
| <b>Downsampling ratio: 3/4</b> |             |             |             |             |             |
| Total (≥500 bp)                | 100,146,918 | 160,635,826 | 104,758,302 | 99,482,324  | 110,747,609 |
| Number of scaffolds (≥500 bp)  | 2,075       | 7,164       | 4,781       | 1,797       | 8,891       |
| Scaffold NG50 (bp)             | 563,178     | 72,054      | 429,998     | 215,803     | 169,528     |
| Corrected scaffold NG50 (bp)   | 326,921     | 5,071       | 255,751     | 143,567     | 2,139       |
| Contig NG50 (bp)               | 35,293      | 1,667       | 62,279      | 61,553      | 689         |
| Corrected contig NG50 (bp)     | 30,515      | 1,504       | 38,095      | 4,219       | 636         |
| Number of errors               | 294         | 645         | 763         | 1,808       | 37,489      |
| <b>Downsampling ratio: 1/2</b> |             |             |             |             |             |
| Total (≥500 bp)                | 98,449,434  | 144,734,796 | 103,810,835 | 99,595,608  | 112,970,331 |
| Number of scaffolds (≥500 bp)  | 1,838       | 8,459       | 4,690       | 2,263       | 5,851       |
| Scaffold NG50 (bp)             | 395,336     | 50,013      | 473,524     | 232,986     | 152,357     |
| Corrected scaffold NG50 (bp)   | 256,464     | 5,056       | 294,279     | 181,402     | 12,114      |
| Contig NG50 (bp)               | 18,024      | 1,353       | 58,528      | 61,235      | 1,807       |
| Corrected contig NG50 (bp)     | 16,441      | 1,207       | 36,779      | 4,562       | 1,727       |
| Number of errors               | 228         | 613         | 776         | 1,100       | 10,950      |
| <b>Downsampling ratio: 1/4</b> |             |             |             |             |             |
| Total (≥500 bp)                | 94,120,074  | 75,874,771  | 101,653,790 | 99,570,849  | 110,355,220 |
| Number of scaffolds (≥500 bp)  | 5,784       | 10,058      | 3,271       | 2,265       | 5,600       |
| Scaffold NG50 (bp)             | 180,087     | 10,725      | 512,796     | 232,827     | 145,335     |
| Corrected scaffold NG50 (bp)   | 121,055     | 1,565       | 305,790     | 179,223     | 19,312      |
| Contig NG50 (bp)               | 3,967       | 0           | 38,113      | 47,175      | 1,765       |
| Corrected contig NG50 (bp)     | 3,832       | 0           | 27,471      | 4,372       | 1,683       |
| Number of errors               | 143         | 462         | 895         | 1,198       | 7,470       |

|                                      | Platanus   | ALLPATHS-LG | MaSuRCA     | SOAPdenovo2 | Velvet      |
|--------------------------------------|------------|-------------|-------------|-------------|-------------|
| <b>Downsampling ratio: 1/8</b>       |            |             |             |             |             |
| Total ( $\geq 500$ bp)               | 43,974,267 | 26,734,177  | 101,263,467 | 98,331,567  | 109,333,015 |
| Number of scaffolds ( $\geq 500$ bp) | 34,186     | 8,090       | 2,974       | 6,820       | 7,489       |
| Scaffold NG50 (bp)                   | 301        | 0           | 361,688     | 126,053     | 135,460     |
| Corrected scaffold NG50 (bp)         | 260        | 0           | 168,031     | 89,918      | 22,461      |
| Contig NG50 (bp)                     | 229        | 0           | 10,001      | 23,852      | 1,639       |
| Corrected contig NG50 (bp)           | 226        | 0           | 8,682       | 6,293       | 1,587       |
| Number of errors                     | 103        | 284         | 1,482       | 863         | 4,533       |
| <b>Downsampling ratio: 1/16</b>      |            |             |             |             |             |
| Total ( $\geq 500$ bp)               | 12,470     | 3,682,752   | 102,854,429 | 99,920,871  | 108,539,408 |
| Number of scaffolds ( $\geq 500$ bp) | 5          | 2,262       | 8,985       | 16,041      | 15,327      |
| Scaffold NG50 (bp)                   | 0          | 0           | 144,551     | 37,972      | 64,141      |
| Corrected scaffold NG50 (bp)         | 0          | 0           | 55,633      | 20,166      | 13,202      |
| Contig NG50 (bp)                     | 0          | 0           | 1,575       | 3,616       | 1,272       |
| Corrected contig NG50 (bp)           | 0          | 0           | 1,506       | 2,017       | 1,236       |
| Number of errors                     | 4          | 116         | 2,020       | 1,234       | 2,589       |

As shown in Supplemental Figure 28, for corrected scaffold NG50, we revealed that Platanus was sensitive to the downsampling effect. The fewer amount of input data, the shorter correct scaffold NG50 were obtained. This tendency was applicable for every test sets. For the other assemblers, these tendencies were not observed. Especially for MaSuRCA and SOAPdenovo2, the results from greater than 1/4 (about x35 sequence coverage) amount of input datum, almost same length of corrected NG50 were gained.

These observations imply that for MaSuRCA and SOAPdenovo2, about x35 sequence redundancy were sufficient to assemble and reached plateaus, so even much more amount of sequences were given the corrected scaffold NG50 were not grown. In contrast, Platanus' optimum coverage might be at 100% (x140 sequence redundancy) or much more amount of sequences. But in the test of 1% and 2% heterozygosity, even comparing the best corrected scaffold NG50 of each assembler marked among all the redundancy, Platanus marked the best statistics within de Bruijn based assemblers and slightly better results than overlap-layout based assembler, MaSuRCA.

## References

Grabherr MG, Haas BJ, Yassour M, Levin JZ, Thompson DA, Amit I, Adiconis X, Fan L, Raychowdhury R, Zeng Q, et al. 2011. Full-length transcriptome assembly from RNA-Seq data without a reference genome. *Nat Biotechnol* **29**: 644-652.

Hu X, Yuan J, Shi Y, Lu J, Liu B, Li Z, Chen Y, Mu D, Zhang H, Li N, Yue Z, Bai F, Li H, Fan W; pIRS: Profile-based Illumina pair-end reads simulator. *Bioinformatics* **28**: 1533-1535.

Kurtz S, Phillippy A, Delcher AL, Smoot M, Shumway M, Antonescu C, Salzberg SL. 2004. Versatile and open software for comparing large genomes. *Genome Biology* **5**: R12.

Langmead B, Salzberg SL. 2012. Fast gapped-read alignment with Bowtie 2. *Nat Methods* **9**: 357-359.

Li H, Handsaker B, Wysoker A, Fennell T, Ruan J, Homer N, Marth G, Abecasis G, Durbin R; 1000 Genome Project Data Processing Subgroup. 2009. The Sequence Alignment/Map format and SAMtools. *Bioinformatics* **25**: 2078-2079.
